# Supplementary material for: Synthesis and biological properties of maleimide-based macrocyclic lactone enediynes
Source: Royal Society of Chemistry journal article supplement (doi:10.1039/d2ob00571a), 2022-01-01
Supplement: d2ob00571a1.pdf [file d2ob00571a1.pdf]

## Supporting Information

### Synthesis and biological properties of maleimide-based macrocyclic lactone enediynes

Xiaoxuan Li, Haotian Lu, Mingming Ji, Ke Sun, Fangxu Pu, Yun Ding\* and Aiguo Hu\*

Shanghai Key Laboratory of Advanced Polymeric Materials, School of Materials Science and Engineering, East China University of Science and Technology, Shanghai 200237, China.

#### Materials

Common organic solvents and reagents were obtained from commercial suppliers and used as received without further purification. Toluene, tetrahydrofuran (THF), N, N-dimethylformamide (DMF) and dichloromethane (DCM) were dried over calcium hydride (CaH<sub>2</sub>) and distilled before use. Dulbecco's modified Eagle's medium (DMEM), phosphate-buffered saline (PBS) and fetal bovine serum (FBS) were obtained from BBI Life Sciences Corporation. 3-[4,5-Dimethylthiazol-2-yl]-2,5-diphenyltetrazolium-bromide (MTT) were purchased from Macklin (Shanghai, China). Annexin V-FITC/PI apoptosis detection kit, phospho-histone H2A.X (Ser139) rabbit monoclonal antibody and Alexa Fluor 555-labeled Donkey Anti-Rabbit IgG (H+L) was purchased from Beyotime Biotechnology. Sonogashira reactions were performed with dry Schlenk technique under nitrogen atmosphere. Pd@DMSN catalyst was synthesized according to our previous work.<sup>1,2</sup> Detailed synthesis of all intermediates is listed below.

#### Characterization

<sup>1</sup>H NMR and <sup>13</sup>C NMR spectra were obtained on either Bruker DRX-400, or DRX-600 instruments and calibrated using chloroform (CDCl<sub>3</sub>) as an internal reference. High-resolution mass spectra (HR-MS) were obtained on a Micromass LCTM mass spectrometer using the ESI method. Differential scanning calorimetry (DSC) was carried out with a Pyris Diamond thermal analysis workstation equipped with a model 822e DSC module under a constant nitrogen flow. Fluorescence spectra were recorded on a PerkinElmer LS-55 (excited at 256 nm). Electron paramagnetic resonance (EPR) measurements were performed with an X-band EMX-8/2.7C EPR spectrometer (Bruker, Germany). Cytotoxicity assay was measured by a microplate reader (Thermo Scientific). Fluorescence microscopy images were taken using a confocal laser scanning microscope (CLSM, C1-Si, Nikon, Japan). Quantitative flow cytometry was recorded by a flow cytometer (Beckman).

## Synthesis

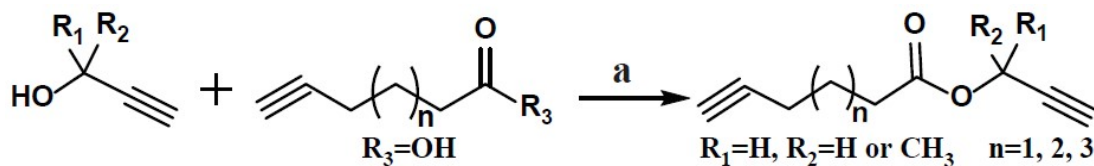

Scheme S1 Synthesis of Diynyl compounds. (a) 4-dimethylaminopyridine (DMAP), 1-(3-dimethylaminopropyl)-3-ethylcarbodiimide hydrochloride (EDC·HCl), DMF, rt, 2h.

### General procedure for the synthesis of terminal dialkynes<sup>3</sup>

To a stirred solution of alkynyl carboxylic acid (441 mg, 4.5 mmol) in DMF (2.5 mL) were added DMAP (55 mg, 0.45 mmol), alkynyl alcohol (379 mg, 5.4 mmol), EDC·HCl (1.035 g, 5.4 mmol) and DMF (5 mL). After the mixture was stirred at room temperature for 2 h, it was poured into brine and extracted with ethyl acetate. The organic layer was dried with anhydrous  $\text{MgSO}_4$ , filtered, and concentrated in vacuo. The crude material was purified by flash chromatography (ethyl acetate/n-hexane=1/5) to afford the desired compound.

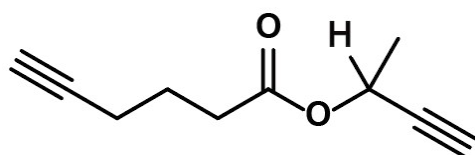

**But-3-yn-2-yl hex-5-ynoate (A1).** 70 % (515 mg);  $^1\text{H}$  NMR (600 MHz,  $\text{CDCl}_3$ )  $\delta$  5.43 (qd,  $J = 6.7, 2.1$  Hz, 1H), 2.47 (t,  $J = 7.4$  Hz, 2H), 2.44 (d,  $J = 2.1$  Hz, 1H), 2.26 (td,  $J = 6.9, 2.6$  Hz, 2H), 1.96 (t,  $J = 2.6$  Hz, 1H), 1.85 (p,  $J = 7.2$  Hz, 2H), 1.49 (d,  $J = 6.7$  Hz, 3H).  $^{13}\text{C}$  NMR (101 MHz,  $\text{CDCl}_3$ )  $\delta$  170.86, 82.13, 81.10, 71.86, 68.20, 58.98, 31.83, 22.48, 20.19, 16.76. HRMS (ESI)  $m/z$ : calcd for  $\text{C}_{10}\text{H}_{12}\text{O}_2\text{Na}$  [ $\text{M} + \text{Na}$ ] $^+$ : 187.0735, found: 187.0737.

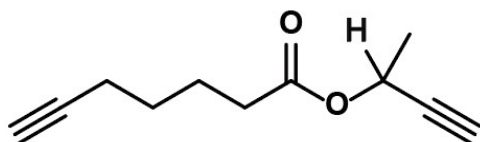

**But-3-yn-2-yl hept-6-ynoate (B1).** 81 % (650 mg);  $^1\text{H}$  NMR (600 MHz,  $\text{CDCl}_3$ )  $\delta$  5.42 (qd,  $J = 6.7, 3.3$  Hz, 1H), 2.43 (d,  $J = 2.1$  Hz, 1H), 2.35 – 2.31 (m, 2H), 2.21 – 2.16 (m, 2H), 1.93 (t,  $J = 2.6$  Hz, 1H), 1.77 – 1.70 (m, 2H), 1.58 – 1.51 (m, 2H), 1.47 (d,  $J = 6.7$  Hz, 3H).  $^{13}\text{C}$  NMR (151 MHz,  $\text{CDCl}_3$ )  $\delta$  171.15, 82.85, 81.15, 71.83, 67.66, 58.88, 32.63, 26.72, 22.84, 20.20, 17.09. HRMS (ESI)  $m/z$ : calcd for  $\text{C}_{11}\text{H}_{14}\text{O}_2\text{Na}$  [ $\text{M} + \text{Na}$ ] $^+$ : 201.0891, found: 201.0892.

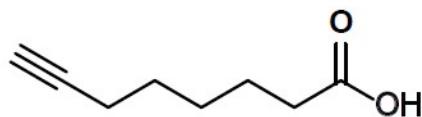

**The synthesis of oct-7-ynoic acid (C0)<sup>4</sup>:** A 50 mL round bottom flask was charged with lithium acetylide-ethylenediamine complex (994 mg, 10.8 mmol) and DMSO (2.3 mL) at 25 °C. The mixture was then cooled to 0 °C in an ice bath and a solution of bromocaproic acid (702 mg, 3.6 mmol) in DMSO (3.1 mL) was added dropwise. After 10 min, the ice bath was removed and the stirring solution was allowed to warm to 25 °C. After 2 h, the reaction mixture was poured over an ice/brine mixture (~100 mL), acidified with 1N HCl and extracted with  $\text{CH}_2\text{Cl}_2$ . The organic layer was dried with  $\text{MgSO}_4$ , filtered, and concentrated in vacuo. The crude residue was purified via flash

column chromatography (ethyl acetate) to yield C0 as a clear oil (200 mg, 40 %).  $^1\text{H NMR}$  (400 MHz,  $\text{CDCl}_3$ )  $\delta$  2.35 (t,  $J = 7.5$  Hz, 2H), 2.18 (td,  $J = 6.9, 2.6$  Hz, 2H), 1.93 (t,  $J = 2.6$  Hz, 1H), 1.64 (dt,  $J = 15.1, 7.5$  Hz, 2H), 1.54 (dt,  $J = 21.0, 6.8$  Hz, 2H), 1.49 – 1.39 (m, 2H).  $^{13}\text{C NMR}$  (151 MHz,  $\text{CDCl}_3$ )  $\delta$  180.19, 84.27, 68.41, 33.93, 28.10, 28.05, 24.14, 18.23.

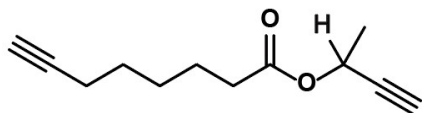

This compound was synthesized according to the general method for the synthesis of terminal dialkynes.

**But-3-yn-2-yl oct-7-ynoate (C1).** 77 % (500 mg);  $^1\text{H NMR}$  (600 MHz,  $\text{CDCl}_3$ )  $\delta$  5.43 (qd,  $J = 6.7, 2.1$  Hz, 1H), 2.43 (d,  $J = 2.1$  Hz, 1H), 2.33 (td,  $J = 7.4, 1.7$  Hz, 2H), 2.18 (td,  $J = 7.0, 2.6$  Hz, 2H), 1.93 (t,  $J = 2.6$  Hz, 1H), 1.65 (dt,  $J = 15.3, 7.6$  Hz, 2H), 1.54 (dt,  $J = 14.5, 7.1$  Hz, 2H), 1.49 (d,  $J = 6.7$  Hz, 3H), 1.46 – 1.40 (m, 2H).  $^{13}\text{C NMR}$  (151 MHz,  $\text{CDCl}_3$ )  $\delta$  172.40, 84.30, 82.21, 72.78, 68.38, 59.84, 34.08, 28.09, 28.06, 24.32, 21.22, 18.23. HRMS (ESI)  $m/z$ : calcd for  $\text{C}_{12}\text{H}_{16}\text{O}_2\text{Na}$  [ $\text{M} + \text{Na}$ ] $^+$ : 215.1048, found: 215.1047.

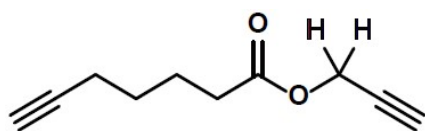

**prop-2-yn-1-yl hept-6-ynoate (D1).** 88 % (650 mg);  $^1\text{H NMR}$  (400 MHz,  $\text{CDCl}_3$ )  $\delta$  4.66 (s, 2H), 2.46 (s, 1H), 2.38 (s, 2H), 2.20 (s, 2H), 1.94 (s, 1H), 1.76 (s, 2H), 1.56 (s, 2H).  $^{13}\text{C NMR}$  (151 MHz,  $\text{CDCl}_3$ )  $\delta$  171.50, 82.81, 76.69, 73.81, 67.68, 50.84, 32.39, 26.71, 22.81, 17.08. HRMS (ESI)  $m/z$ : calcd for  $\text{C}_{10}\text{H}_{12}\text{O}_2\text{Na}$  [ $\text{M} + \text{Na}$ ] $^+$ : 187.0735, found: 187.0736.

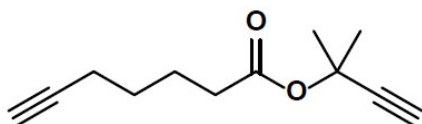

**The synthesis of 2-methylbut-3-yn-2-yl hept-6-ynoate (E1):** To 6-heptynoic acid (0.76 g, 6.0 mmol) in 12 mL of dichloromethane was added oxalyl chloride (4.5 g, 36 mmol) and the mixture was refluxed at 70 °C for an hour. DCM and oxalyl chloride were removed by evaporation affording a colorless oil<sup>5</sup>. Then the obtained hept-6-ynoyl chloride (5.7 mmol) was added to the 2-methylbut-3-yn-2-ol (57 mmol) and the mixture was stirred in a 25 mL round-bottom flask equipped with a magnetic stir bar during 1 hour. The crude product was purified by column chromatography (ethyl acetate/n-hexane=1/5) to achieve E1 as a colorless oil (950 mg, 87 %).  $^1\text{H NMR}$  (400 MHz,  $\text{CDCl}_3$ )  $\delta$  2.51 (s, 1H), 2.28 (t,  $J = 7.4$  Hz, 2H), 2.23 – 2.14 (m, 2H), 1.93 (t,  $J = 2.6$  Hz, 1H), 1.76 – 1.68 (m, 2H), 1.65 (s, 6H), 1.55 (dt,  $J = 14.5, 7.1$  Hz, 2H).  $^{13}\text{C NMR}$  (151 MHz,  $\text{CDCl}_3$ )  $\delta$  170.67, 71.23, 70.51, 67.56, 33.34, 27.90, 26.73, 22.89, 17.12. HRMS (ESI)  $m/z$ : calcd for  $\text{C}_{12}\text{H}_{16}\text{O}_2\text{Na}$  [ $\text{M} + \text{Na}$ ] $^+$ : 215.1048, found: 215.1049.

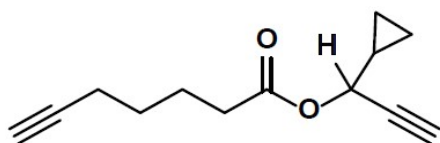

**The synthesis of 1-cyclopropylprop-2-yn-1-yl hept-6-ynoate (F1):** A solution of ethynyl-magnesium bromide (100 mL, 50 mmol) was added slowly to a solution of cyclopropane-carboxaldehyde (42 mmol) in THF (30 mL) under a

nitrogen atmosphere at -78 °C. The cold bath was then removed and the reaction mixture was stirred at room temperature. After 2 h, the reaction was quenched with saturated NH<sub>4</sub>Cl aqueous solution and extracted with Et<sub>2</sub>O. The combined organic layers were washed with brine, dried over MgSO<sub>4</sub> and filtered. The solvent was removed by rotary evaporation to furnish 1-cyclopropylprop-2-yn-1-ol, which was used in the next step without further purification<sup>6</sup>.

The hept-6-ynoyl chloride (6 mmol, 870 mg) and N, N-Diisopropylethylamine (DIPEA, 9 mmol, 1.48 mL) was added to the solution of 1-cyclopropylprop-2-yn-1-ol (17 mmol, 1.6 g) in DCM (3 mL) and the mixture was stirred in a 25 mL round-bottom flask equipped with a magnetic stir bar during 12 h. After completion of the reaction, the solvent was removed by rotary evaporation. The crude residue was purified via flash column chromatography (ethyl acetate/n-hexane=1/5) to yield F1 as a clear oil (762 mg, 62 %). <sup>1</sup>H NMR (600 MHz, CDCl<sub>3</sub>) δ 5.18 (dd, *J* = 7.1, 1.9 Hz, 1H), 2.41 (d, *J* = 2.2 Hz, 1H), 2.37 (t, *J* = 7.4 Hz, 2H), 2.20 (td, *J* = 7.0, 2.5 Hz, 2H), 1.93 (t, *J* = 2.6 Hz, 1H), 1.81 – 1.70 (m, 2H), 1.61 – 1.50 (m, 2H), 1.3 – 1.19 (m, 1H), 0.6 – 0.44 (m, 4H). <sup>13</sup>C NMR (151 MHz, CDCl<sub>3</sub>) δ 170.18, 81.71, 77.18, 71.37, 66.48, 64.88, 31.51, 25.57, 21.75, 15.94, 12.14, 1.37, -1.16. HRMS (ESI) *m/z*: calcd for C<sub>13</sub>H<sub>16</sub>O<sub>2</sub>Na [M + Na]<sup>+</sup>: 227.1048, found: 227.1049.

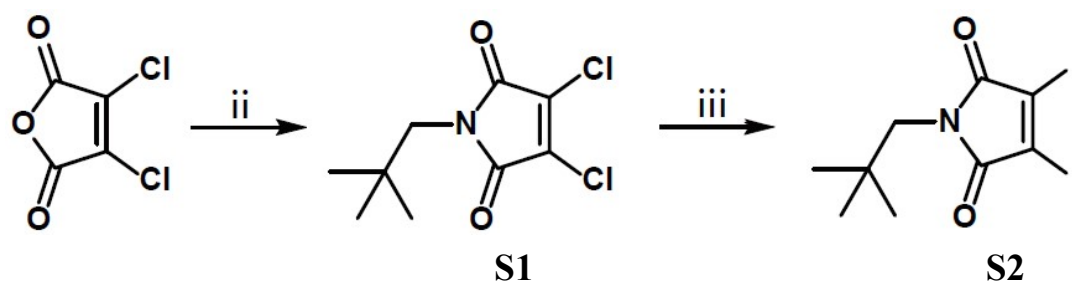

Scheme S2 Synthesis of compound C2. (a) Neopentylamine, acetic acid, 120 °C, 24 h. (b) NaI, acetonitrile, 85 °C, 20 h.

### 3,4-Dichloro-1-(2,2-dimethyl-propyl)-pyrrole-2,5-dione (S1)

This compound was synthesized following the procedure described in our previous work.<sup>7</sup> Dichloromaleic anhydride (8.35 g, 50 mmol) was dissolved in acetic acid (40 mL) with slow addition of neopentylamine (3.92 g, 45 mmol) at 0 °C; the solution was refluxed at 120 °C for 24 h. After removal of solvent, the crude residue was separated by column chromatography on silica gel (hexane/ethyl acetate = 9:1) to give the product S1 (8.02 g, 75.5%).

### 3,4-diiodo-1-(2,2-dimethyl-propyl)-pyrrole-2,5-dione (S2)

This compound was synthesized following the procedure described in our previous work.<sup>7</sup> A solution of sodiumiodide (7.79 g, 132 mmol) and 3,4-dichloro-1-(2,2-dimethyl-propyl)-pyrrole-2,5-dione (19.79 g, 33 mmol) in acetonitrile (70 mL) was refluxed at 85 °C for 20 h. Then the solution was added to water with yellow floccule precipitated. After completion of the reaction, the solvent was removed by rotary evaporation. The crude residue was purified via flash column chromatography using DCM as eluent and drying at 50 °C, the compound S2 was obtained (12.64 g, 91.4 %).

### General procedure for the synthesis of macrocyclic enediynes

Compound S2 (209.5 mg, 0.5 mmol), 1.67 equivalent of 6% Pd@DMSN (88.7mg), CuI (38 mg, 0.2 mmol), and DIPEA (0.25 mL, 1.5 mmol) were successively added into a solvent mixture of dry THF (1.5 mL) and toluene (5 mL) under a nitrogen atmosphere. Then, the solution of terminal dialkyne (0.75 mmol) in THF (1 mL) was added dropwisely.

The mixture was stirred at room temperature and monitored with TLC. After completion of the reaction, the mixture was purified through column chromatograph to give the desired compound.

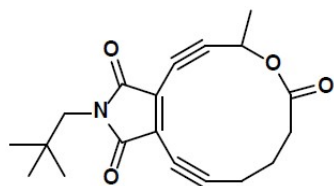

**6-methyl-2-neopentyl-6,9,10,11-tetrahydro-4,5,12,13-tetradehydro-[1]oxacyclododecino[5,6-c]pyrrole-1,3,8(2H)-trione (EDY-A). 15 mg (9.2%);**  $^1\text{H}$  NMR (600 MHz,  $\text{CDCl}_3$ )  $\delta$  5.50 (q,  $J = 6.9$  Hz, 1H), 3.31 (s, 2H), 2.81 (ddd,  $J = 18.3, 5.6, 3.0$  Hz, 1H), 2.63 – 2.53 (m, 2H), 2.43 (dd,  $J = 15.9, 10.4$  Hz, 1H), 2.31 (dt,  $J = 23.5, 9.3$  Hz, 1H), 1.91 (ddd,  $J = 18.2, 8.9, 4.1$  Hz, 1H), 1.59 (d,  $J = 7.0$  Hz, 3H), 0.88 (s, 9H).  $^{13}\text{C}$  NMR (151 MHz,  $\text{CDCl}_3$ )  $\delta$  172.31, 166.89, 166.79, 134.63, 129.76, 112.08, 111.36, 77.45, 72.99, 61.95, 49.75, 33.55, 33.52, 27.83, 21.98, 21.27, 18.60. HRMS (ESI)  $m/z$ : calcd for  $\text{C}_{19}\text{H}_{21}\text{NO}_4\text{Na}$   $[\text{M} + \text{Na}]^+$ : 350.1368, found: 350.1367.

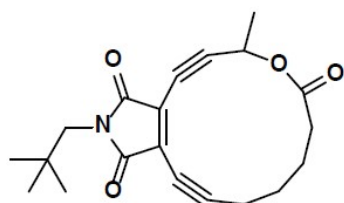

**6-methyl-2-neopentyl-9,10,11,12-tetrahydro-1H-4,5,13,14-tetradehydro-[1]oxacyclotridecino[5,6-c]pyrrole-1,3,8(2H,6H)-trione (EDY-B). 28 mg (16.4%);**  $^1\text{H}$  NMR (400 MHz,  $\text{CDCl}_3$ )  $\delta$  5.75 (q,  $J = 6.9$  Hz, 1H), 3.32 (s, 2H), 2.71 (d,  $J = 20.3$  Hz, 1H), 2.51 (dd,  $J = 12.1, 5.4$  Hz, 1H), 2.44 – 2.33 (m, 1H), 2.15 (t,  $J = 12.0$  Hz, 1H), 2.02 – 1.93 (m, 1H), 1.81 (dd,  $J = 8.1, 5.7$  Hz, 3H), 1.60 (d,  $J = 6.9$  Hz, 3H), 0.89 (s, 9H).  $^{13}\text{C}$  NMR (151 MHz,  $\text{CDCl}_3$ )  $\delta$  170.97, 166.22, 166.20, 131.31, 128.39, 113.35, 106.95, 74.20, 71.23, 59.41, 48.87, 32.89, 32.55, 26.85, 26.32, 22.98, 19.46, 18.78. HRMS (ESI)  $m/z$ : calcd for  $\text{C}_{20}\text{H}_{23}\text{NO}_4\text{Na}$   $[\text{M} + \text{Na}]^+$ : 364.1525, found: 364.1526.

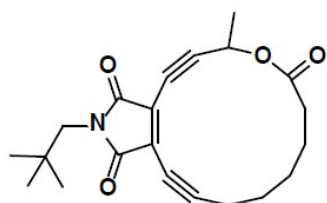

**6-methyl-2-neopentyl-6,9,10,11,12,13-hexahydro-4,5,14,15-tetradehydro-[1]oxacyclotetradecino[5,6-c]pyrrole-1,3,8(2H)-trione (EDY-C). 21 mg (11.8%);**  $^1\text{H}$  NMR (600 MHz,  $\text{CDCl}_3$ )  $\delta$  5.68 (q,  $J = 6.9$  Hz, 1H), 3.33 (s, 2H), 2.65 – 2.56 (m, 2H), 2.49 – 2.42 (m, 1H), 2.40 – 2.35 (m, 1H), 1.78 – 1.72 (m, 2H), 1.66 – 1.59 (m, 7H), 0.90 (s, 9H).  $^{13}\text{C}$  NMR (151 MHz,  $\text{CDCl}_3$ )  $\delta$  171.66, 166.44, 166.42, 129.46, 127.31, 112.09, 106.17, 74.09, 71.97, 59.25, 48.95, 33.18, 32.55, 26.85, 26.08, 25.83, 24.54, 19.48, 18.99. HRMS (ESI)  $m/z$ : calcd for  $\text{C}_{21}\text{H}_{25}\text{NO}_4\text{Na}$   $[\text{M} + \text{Na}]^+$ : 378.1681, found: 378.1682.

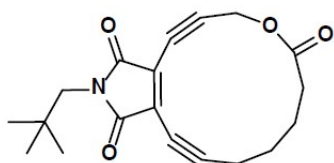

**2-neopentyl-9,10,11,12-tetrahydro-4,5,13,14-tetradehydro-1H-[1]oxacyclotridecino[5,6-c]pyrrole-1,3,8(2H,6H)-**

**trione (EDY-D). 17 mg (10.4%);**  $^1\text{H}$  NMR (600 MHz,  $\text{CDCl}_3$ )  $\delta$  5.00 (s, 2H), 3.33 (s, 2H), 2.58 – 2.54 (m, 2H), 2.38 – 2.34 (m, 2H), 1.90 (dt,  $J = 10.8, 6.9$  Hz, 2H), 1.82 (dt,  $J = 12.5, 6.9$  Hz, 2H), 0.90 (s, 9H).  $^{13}\text{C}$  NMR (151 MHz,  $\text{CDCl}_3$ )  $\delta$  171.06, 166.16, 131.37, 113.36, 103.12, 76.13, 71.16, 51.01, 48.89, 32.72, 32.55, 28.68, 26.85, 26.25, 19.43. HRMS (ESI)  $m/z$ : calcd for  $\text{C}_{19}\text{H}_{21}\text{NO}_4\text{Na}$   $[\text{M} + \text{Na}]^+$ : 350.1368, found: 350.1360.

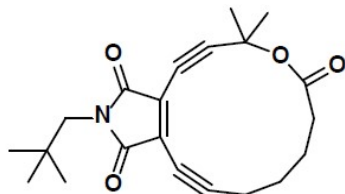

**6,6-dimethyl-2-neopentyl-9,10,11,12-tetrahydro-4,5,13,14-tetradehydro-1H-[1]oxacyclotridecino[5,6-c]pyrrole-1,3,8(2H,6H)-trione (EDY-E). 30 mg (16.9%);**  $^1\text{H}$  NMR (600 MHz,  $\text{CDCl}_3$ )  $\delta$  3.32 (s, 2H), 2.55 – 2.51 (m, 2H), 2.26 – 2.22 (m, 2H), 1.91 (ddd,  $J = 14.1, 9.1, 4.2$  Hz, 2H), 1.88 – 1.84 (m, 2H), 1.77 (s, 6H), 0.89 (s, 9H).  $^{13}\text{C}$  NMR (151 MHz,  $\text{CDCl}_3$ )  $\delta$  172.24, 167.37, 167.34, 131.33, 129.54, 113.98, 110.49, 75.05, 72.87, 72.10, 49.81, 34.22, 33.54, 28.34, 27.84, 27.42, 24.23, 20.48. HRMS (ESI)  $m/z$ : calcd for  $\text{C}_{21}\text{H}_{25}\text{NO}_4\text{Na}$   $[\text{M} + \text{Na}]^+$ : 378.1681, found: 378.1683.

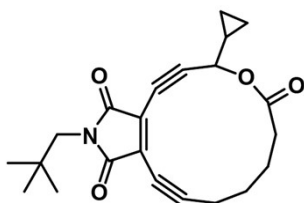

**6-cyclopropyl-2-neopentyl-9,10,11,12-tetrahydro-4,5,13,14-tetradehydro-1H-[1]oxacyclotridecino[5,6-c]pyrrole-1,3,8(2H,6H)-trione (EDY-F). 18 mg (9.8%);**  $^1\text{H}$  NMR (600 MHz,  $\text{CDCl}_3$ )  $\delta$  5.36 (d,  $J = 7.7$  Hz, 1H), 3.32 (s, 2H), 2.71 (ddd,  $J = 18.3, 5.2, 2.3$  Hz, 1H), 2.58 – 2.53 (m, 1H), 2.39 (ddd,  $J = 18.4, 10.9, 2.6$  Hz, 1H), 2.20 – 2.13 (m, 1H), 2.03 – 1.96 (m, 1H), 1.82 – 1.77 (m, 2H), 1.37 – 1.31 (m, 1H), 0.98 (t,  $J = 6.5$  Hz, 1H), 0.89 (s, 9H), 0.73 – 0.63 (m, 2H), 0.60 – 0.50 (m, 2H).  $^{13}\text{C}$  NMR (151 MHz,  $\text{CDCl}_3$ )  $\delta$  172.07, 167.22, 167.15, 132.63, 129.41, 114.45, 105.76, 75.79, 72.29, 68.07, 49.91, 34.00, 33.56, 27.88, 27.37, 24.01, 20.49, 13.65, 3.77, 2.94. HRMS (ESI)  $m/z$ : calcd for  $\text{C}_{21}\text{H}_{25}\text{NO}_4\text{Na}$   $[\text{M} + \text{Na}]^+$ : 390.1681, found: 390.1680.

#### EPR Measurements

A series of enediynes (20 mM) with an excess of PBN (100 mM) were respectively incubated in DMSO at 37 °C for 12 h. The solution of PBN (100 mM) in DMSO without addition of enediyne was used as the control. Measurements were performed with an X-band EMX-8/2.7C EPR spectrometer (Bruker, Germany). The settings of the spectrometer were as follows: sweep width, 150 G; time constant, 163.84 ms; conversion time, 40.96 ms; resolution, 1024 points; modulation frequency, 100.00 kHz; modulation amplitude, 1.00 G; and microwave power, 6.420 mW.

#### DNA Cleavage Assay

Freshly prepared enediynes were dissolved in DMSO to a concentration of 20 mM respectively. 1  $\mu\text{L}$  pUC19 plasmid DNA (200 ng/ $\mu\text{L}$ , in pH 8 TE solution) was added to 17  $\mu\text{L}$  ultra-pure water, then EDYs in DMSO were added. Extra DMSO were added if it is necessary to maintain a total volume of 17  $\mu\text{L}$ . Control samples consisting a solution of pUC19 DNA (200 ng/ $\mu\text{L}$ ) in ultra-pure water (17  $\mu\text{L}$ ) were separately incubated with 8  $\mu\text{L}$  DMSO. All samples were incubated at 37 °C for 48 h. After incubation, each system (8  $\mu\text{L}$ ) was mixed with 6  $\times$  loading buffer (2  $\mu\text{L}$ ) and subjected to 1% agarose gel electrophoresis at 90 V for 1 h, stained by Dured and then the gel was photographed

on a UV transilluminator (FR-200A) and analyzed by scanning densitometry.

### **Cytotoxicity Assay**

The cytotoxicity of enediynes were investigated by 3-(4,5-dimethyl-2-thiazole)-3,5-diphenyl-2H-tetrazol-3-ium bromide (MTT) assay. HeLa cells were obtained from the Chinese Academy of Science Cell Bank for Type Culture Collection (Shanghai, China) and cultured in DMEM medium supplemented with 10% FBS and 1% antibiotics (penicillin–streptomycin, 10000 U/mL) in a humidified incubator at 37 °C with 5% CO<sub>2</sub>. The cells were trypsinized until they reached 70% confluence in the tissue culture flasks with a buffered saline solution containing 0.25% trypsin and 0.03% EDTA. Cells were seeded into a 96-well plate (5000 cells and 100 µL cell culture medium per well) and incubated overnight for adherence. After incubation, the culture medium was removed and the cells were then exposed to 0.16, 0.31, 0.62, 1.25, 2.5, 5, 10, 20 µM concentrations of EDY. The culture medium (with 0.1% DMSO) was used as a blank control. After incubation for another 48 h, 10 µL of sterile filtered MTT stock solution (5 mg/mL) in PBS (pH 7.4) was added to each well and the cells were further incubated at 37 °C for 4 h to allow the yellow dye to transform into blue crystals. Then, the medium was replaced with 150 µL of DMSO to dissolve the purple MTT-formazan crystals. Finally, the optical density was measured using a microplate reader at a wavelength of 570 nm. The spectrophotometer was normalized using a culture medium without cells. Cell viability (%) related to control wells containing cell culture medium was calculated by  $[\text{OD}]_{\text{test}}/[\text{OD}]_{\text{control}}$ .

### **Cellular Uptake**

The cellular uptake of enediynes in vitro were examined using HeLa cells as a model cell line with Confocal Laser Scanning Microscopy (CLSM). HeLa cells were seeded in glass bottom confocal dishes at a density of  $2 \times 10^5$  per well in 2 mL of DMEM and incubated for 24 h. After removal of culture medium, cells were incubated with EDY-A (4 µM) or EDY-B (1 µM) in 2 mL of DMEM respectively. HeLa cells without any drug were incubated as a blank control. After 14 h of incubation at 37 °C, the cells are gently washed three times with PBS. Subsequently, the cells were fixed with 2.5% glutaraldehyde at room temperature for 20 min, and the slides were rinsed with PBS three times. After permeated by 0.5% Triton solution for 10 min, washed three times with PBS again. Then, 400 µL of propidium iodide (PI) solution (15 µg/mL) was added and the cells were cultured at 37 °C in the dark for 10 min, followed by washing with cold PBS for three times. The resulting slides were mounted and observed using a LEICA TCS SP8 fluorescence microscope.

### **Intracellular DNA Damage Assay**

Cells were cultured using the same procedure as the cellular uptake assay. After fixation and permeation, cells were blocked by 8% BSA/PBS for 2 h at room temperature. Then, cells were stained with phospho-histone H2A.X (Ser139) rabbit monoclonal antibody (1:200 dilution in 1% BSA/PBS, at 4 °C, overnight) and labeled with secondary antibodies (Alexa Fluor® 488 dye, 1:1000 dilution, RT, 2 h). The nuclei were further stained with PI for visualizing DNA. After incubation, cells were washed three times with PBS (5 min each), and the  $\gamma$ -H2AX foci was imaged via CLSM.

### **Cell Cycle Arrest Assay**

HeLa cells were seeded in 6-well plates at a density of  $2 \times 10^5$  per well in 2 mL of DMEM and incubated overnight. After removing the medium and washing with PBS, the cells were incubated with different concentrations of EDY-B at 37 °C for 24 h. HeLa cells without drug were used as a control. Cells were harvested by trypsinization, rinsed and resuspended in cold PBS, and fixed with 70% ethanol overnight at 4 °C. Then the cells were washed with PBS, stained with 400 µL PI solution (10 µg/mL PI and 0.1% Triton-X100 in PBS) after centrifugation (4 °C, 1000 r.p.m., 5

min) and incubated at 37 °C in the dark for 30 min. Finally, DNA content was measured by Flow Cytometry (BDFACSCalibur, USA), the percentage of cells in each phase of the cell cycle was calculated using the Flow Jo software.

#### Apoptosis Assay

HeLa cells were seeded in 6-well plates at a density of  $2 \times 10^5$  per well in 2 mL of DMEM and incubated overnight. After removing the medium and washing with PBS, the cells were incubated with different concentrations of EDY-B at 37 °C for 24 h. HeLa cells without drug were used as a control. Then, the treated cells were harvested by trypsinization, washed twice with cold PBS. After that, the cells were resuspended in 400  $\mu$ L annexin binding buffer and stained with Annexin V-FITC (5  $\mu$ L) and PI (5  $\mu$ L) at room temperature for 15 min and analyzed by flow cytometry (BDFACSCalibur, USA)

Table S1 Physicochemical properties and reactivity evaluation in the Myers-Saito Cyclization of enediyne compounds

| Compound | Molecular formular                              | Molecular weight (g/mol) | Cycle size | Log p | $\Delta G$ (Kcal/mol)    |
|----------|-------------------------------------------------|--------------------------|------------|-------|--------------------------|
| EDY-A    | C <sub>19</sub> H <sub>21</sub> NO <sub>4</sub> | 327                      | 12         | 2.12  | 21.6                     |
| EDY-B    | C <sub>20</sub> H <sub>23</sub> NO <sub>4</sub> | 341                      | 13         | 2.53  | 25.7                     |
| EDY-C    | C <sub>21</sub> H <sub>25</sub> NO <sub>4</sub> | 355                      | 14         | 2.95  | 26.7                     |
| EDY-D    | C <sub>19</sub> H <sub>21</sub> NO <sub>4</sub> | 327                      | 13         | 2.22  | 27.9 & 18.5 <sup>a</sup> |
| EDY-E    | C <sub>21</sub> H <sub>25</sub> NO <sub>4</sub> | 355                      | 13         | 2.75  |                          |
| EDY-F    | C <sub>22</sub> H <sub>25</sub> NO <sub>4</sub> | 367                      | 13         | 2.92  | 25.5                     |

<sup>a</sup> The two data are the energy barriers of MSC after single and multiple 1,3-proton transfer steps<sup>8</sup>, respectively.

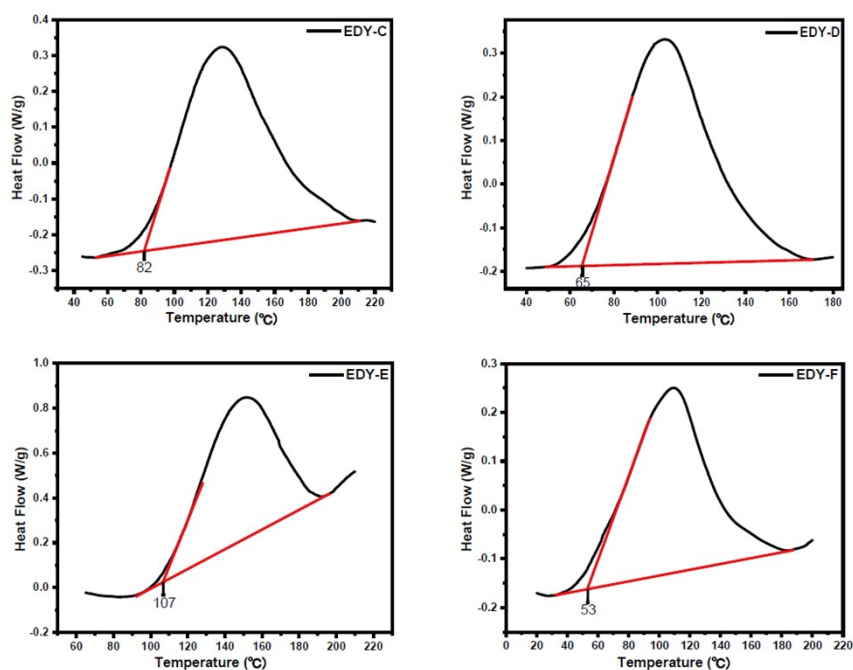

Fig. S1 DSC curves of neat enediynes at a heating rate of 10 °C/min. The baselines are marked in red for guide of view.



Table S2 Onset temperature of enediynes measured by DSC.

| EDY                                   | A  | B  | C  | D  | E   | F  |
|---------------------------------------|----|----|----|----|-----|----|
| $T_{\text{onset}} (^{\circ}\text{C})$ | 47 | 73 | 82 | 65 | 107 | 53 |

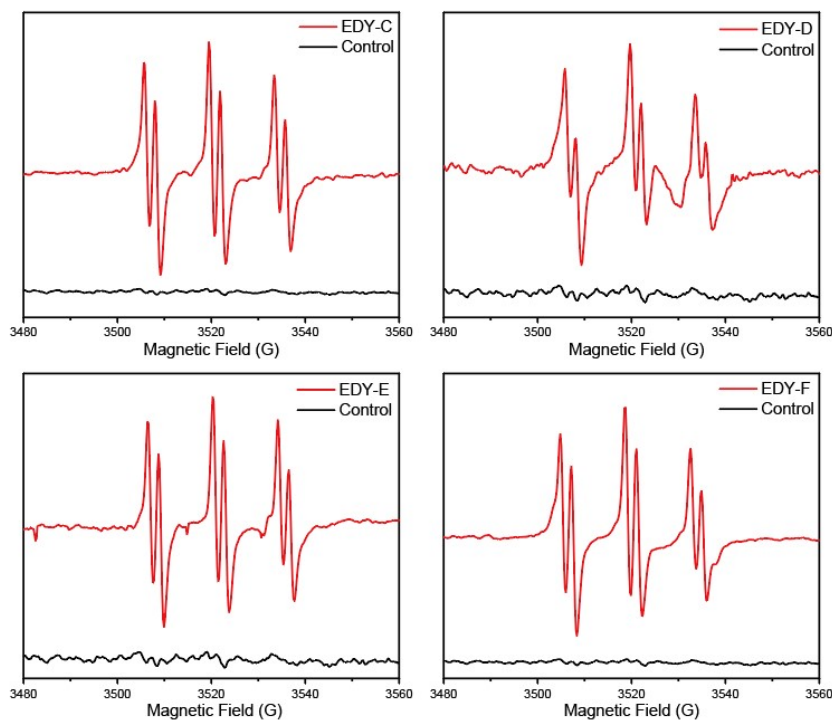

Fig. S2 EPR curves of enediynes.

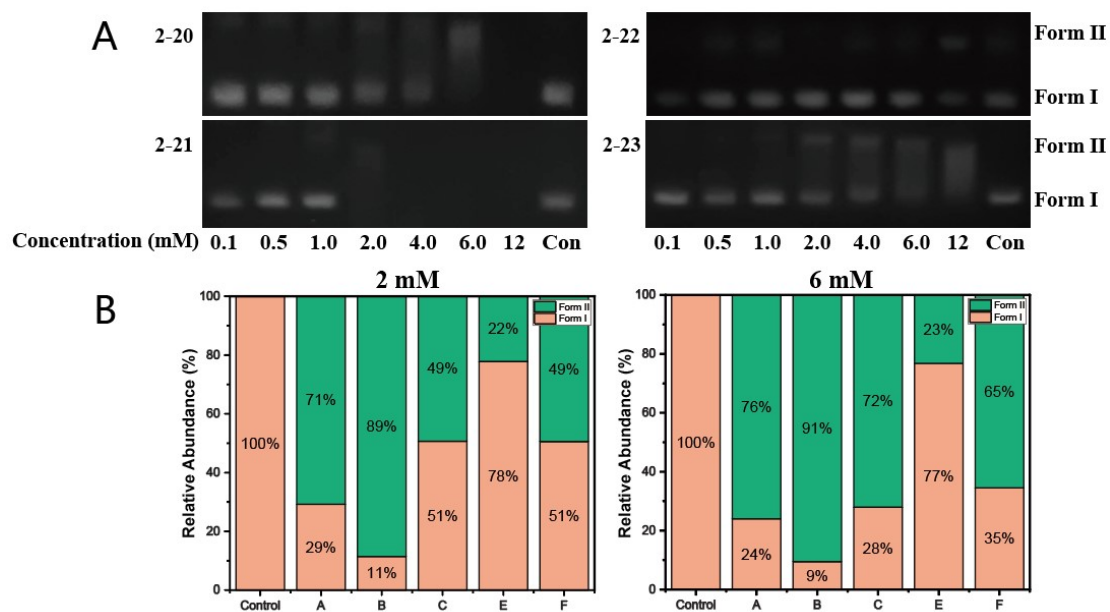

Fig. S3 (A) Agarose gel electrophoretic image of enediynes. (B) Quantified cleavage data for DNA cleavage assay of

enediynes at the concentration of 2  $\mu\text{M}$  and 6  $\mu\text{M}$ . Control: pUC19 (10  $\mu\text{g mL}^{-1}$ ) alone.

Table S3  $\text{IC}_{50}$  values of enediynes against Hela cells obtained by MTT assay.

| EDY                                | A    | B    | C    | D    | E     | F    |
|------------------------------------|------|------|------|------|-------|------|
| $\text{IC}_{50}$ ( $\mu\text{M}$ ) | 3.90 | 0.63 | 0.57 | 3.85 | 12.80 | 5.29 |

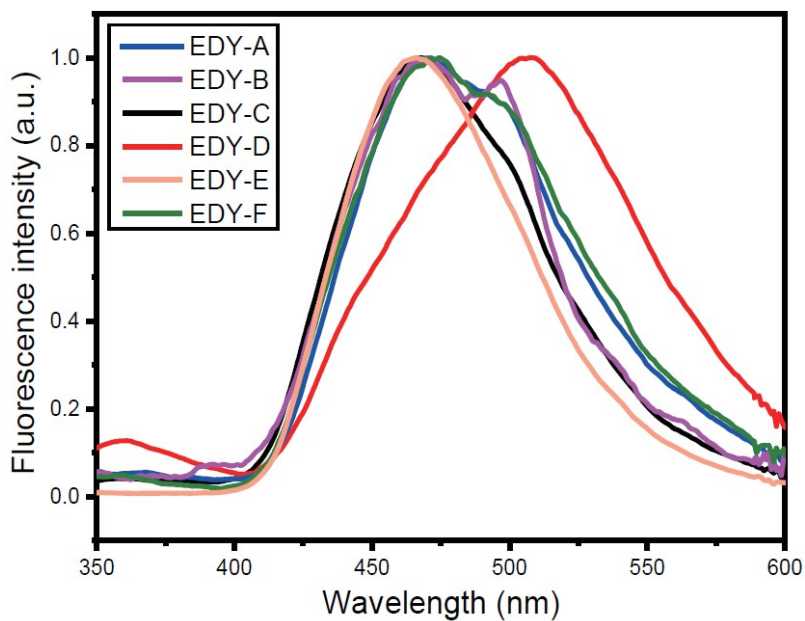

Fig. S4 Fluorescence emission spectra of enediynes in DCM ( $\lambda_{\text{ex}} = 254 \text{ nm}$ ).

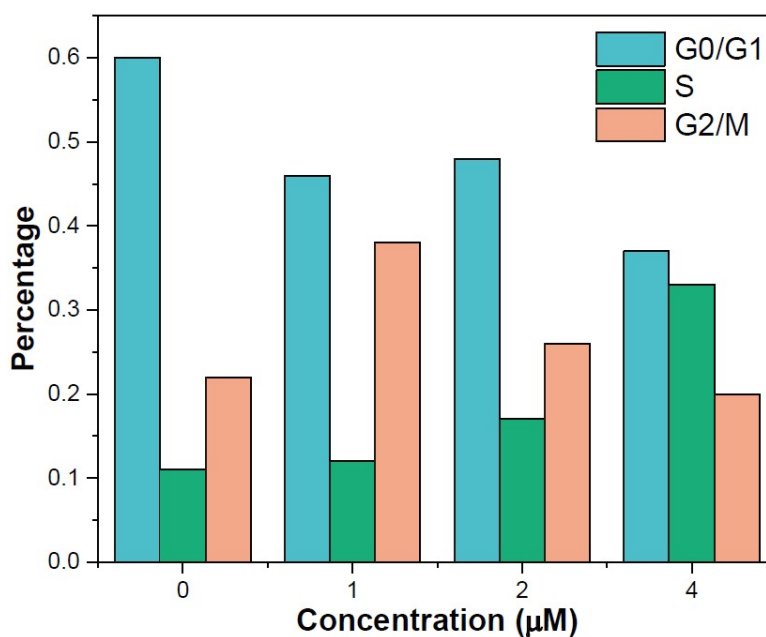

Fig. S5 Concentration dependence of cell cycle distributions of Hela cells treated with EDY-B.

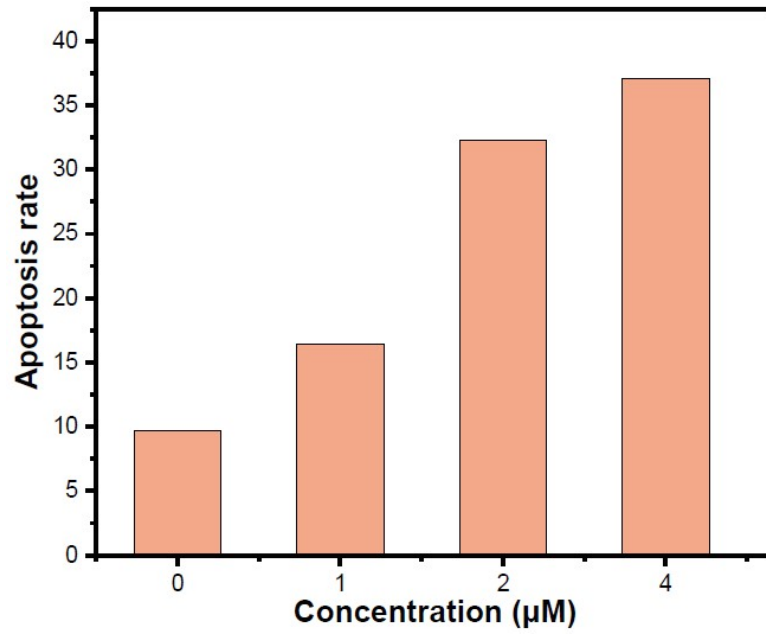

Fig. S6 Concentration dependence of the apoptosis rate of HeLa cells treated with EDY-B.

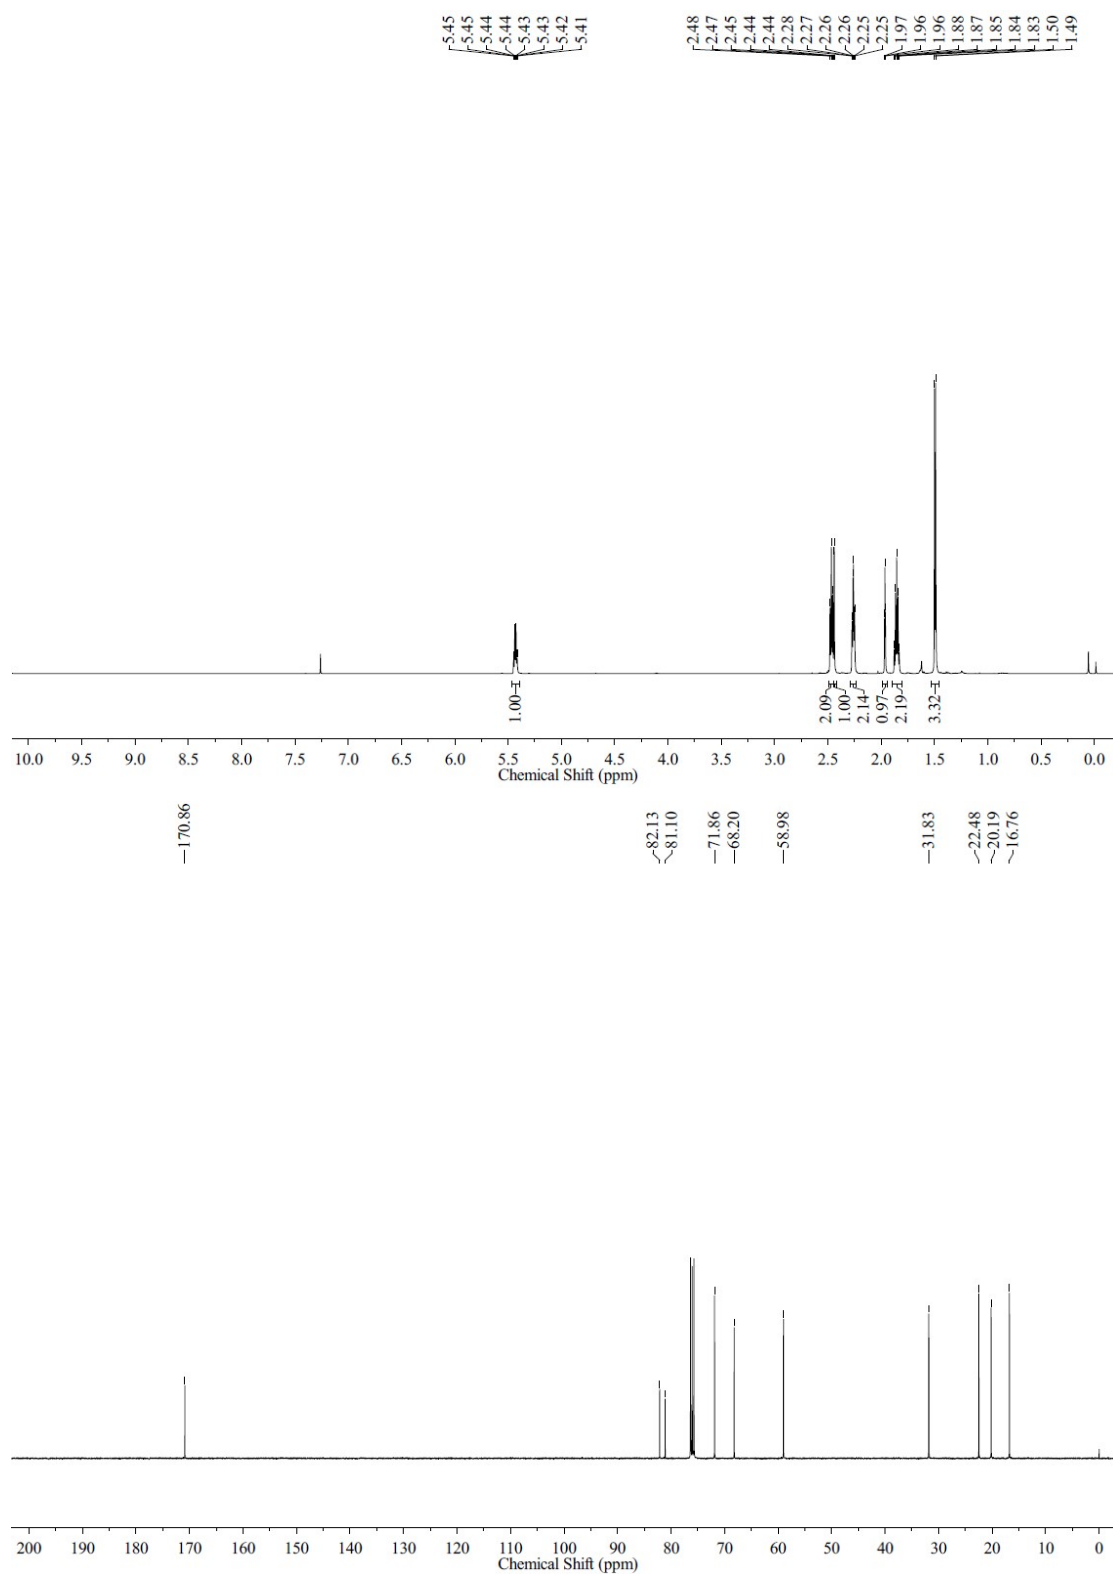

Fig. S7 <sup>1</sup>H NMR and <sup>13</sup>C NMR spectra of compound A1

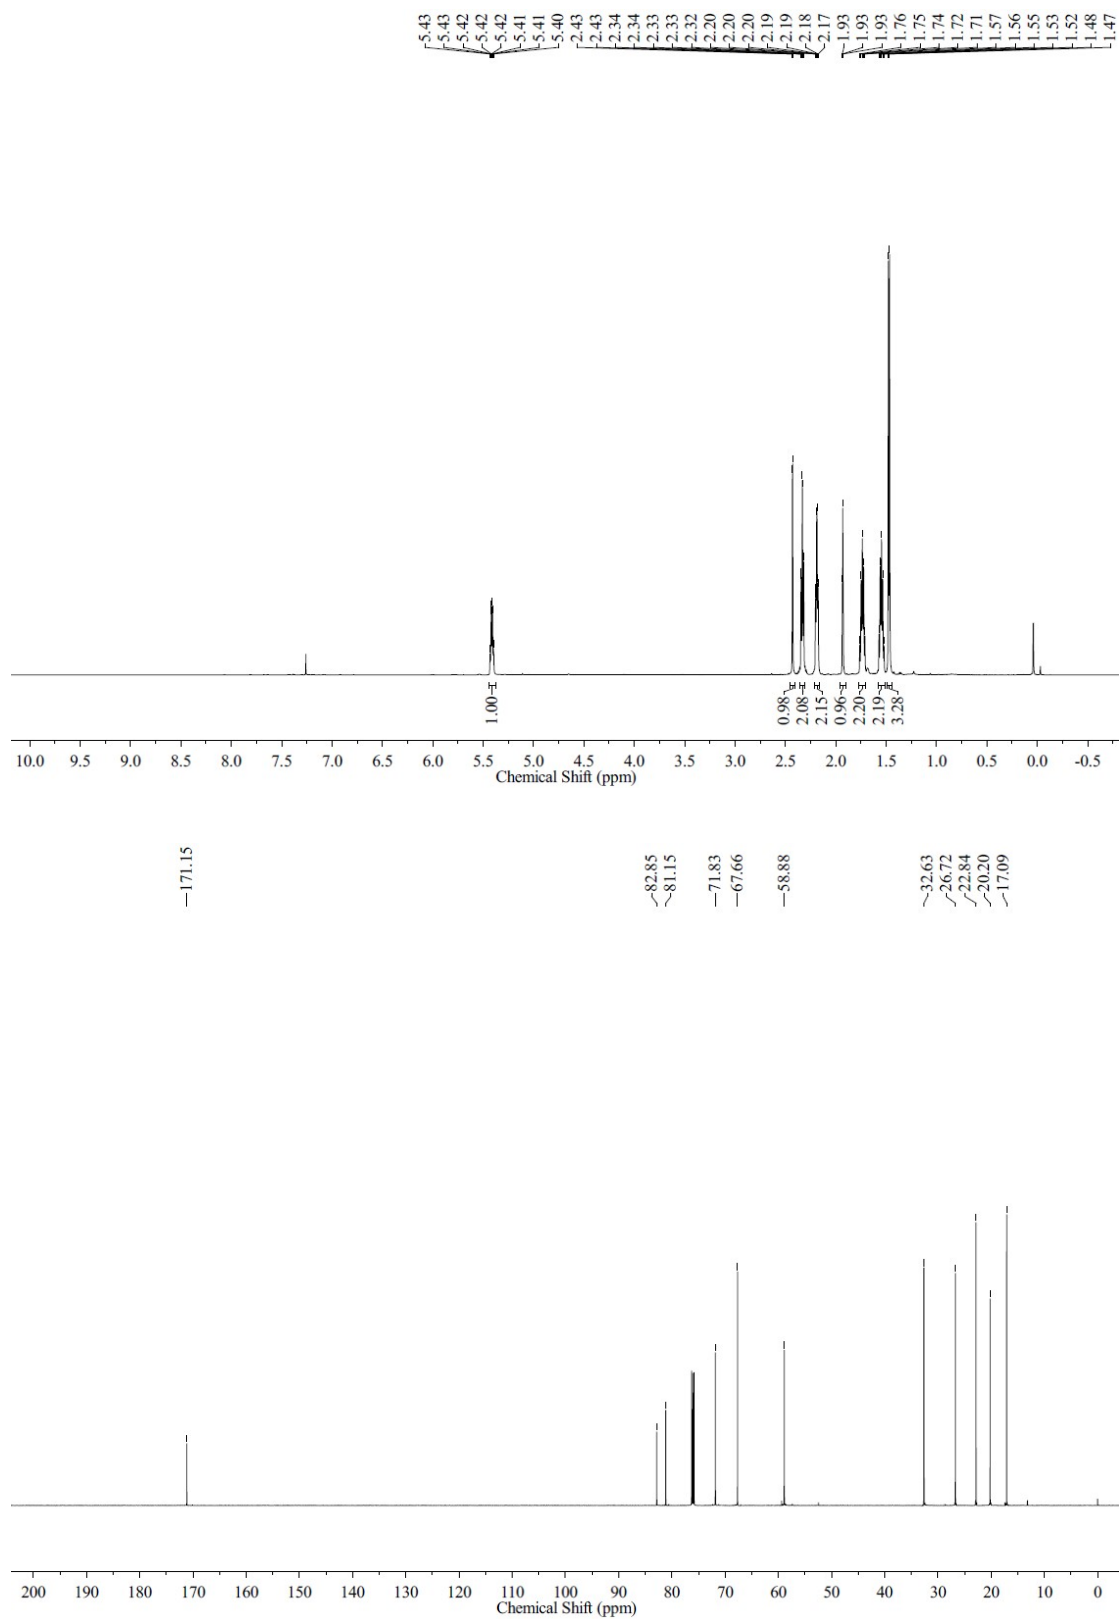

Fig. S8  $^1\text{H}$  NMR and  $^{13}\text{C}$  NMR spectra of compound B1

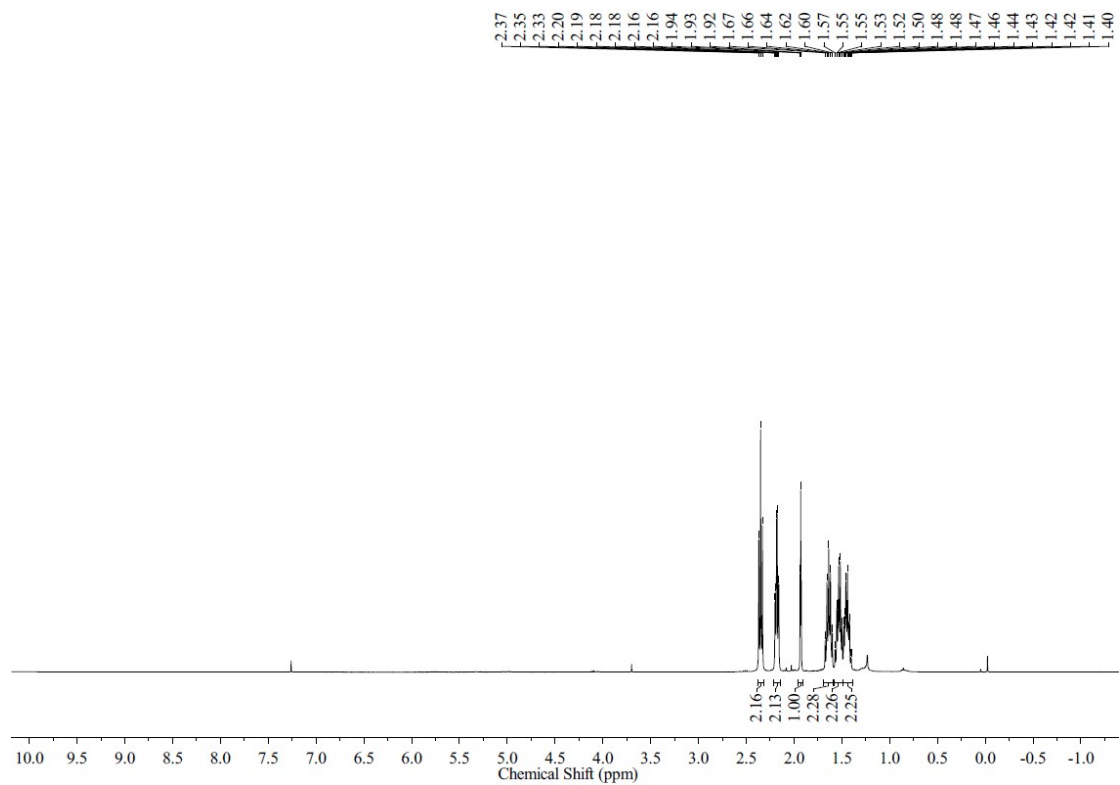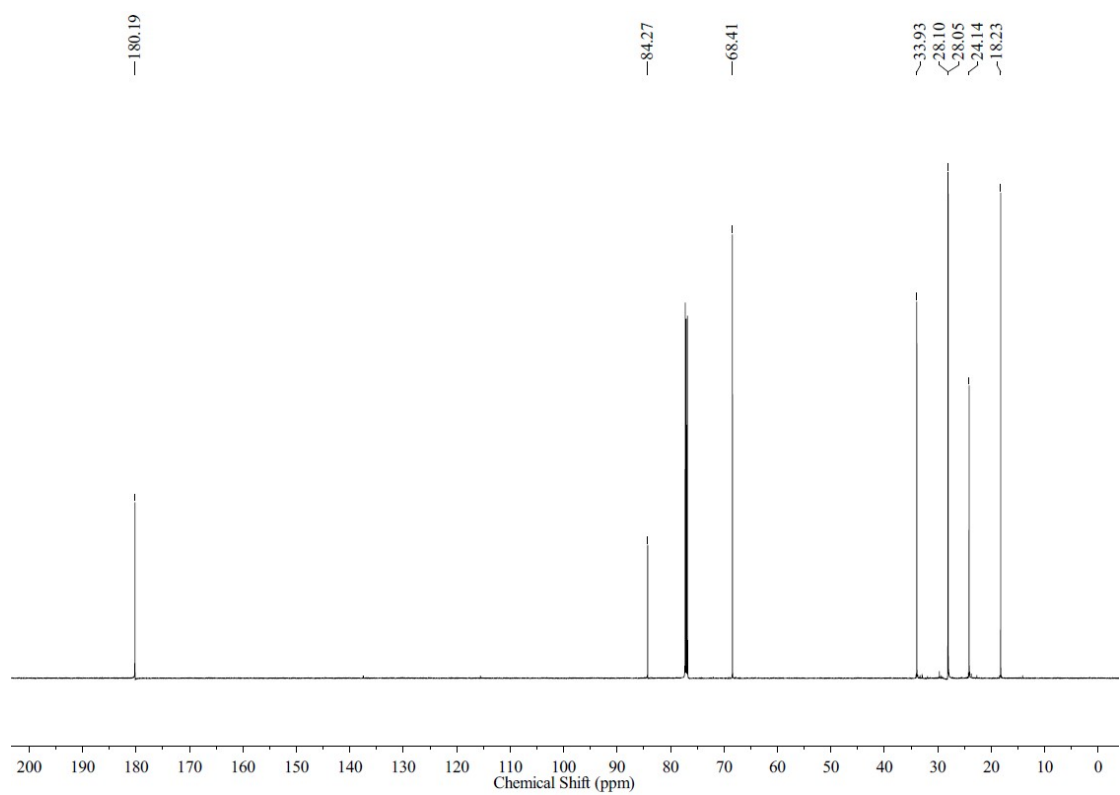

Fig. S9  $^1\text{H}$  NMR and  $^{13}\text{C}$  NMR spectra of compound CO

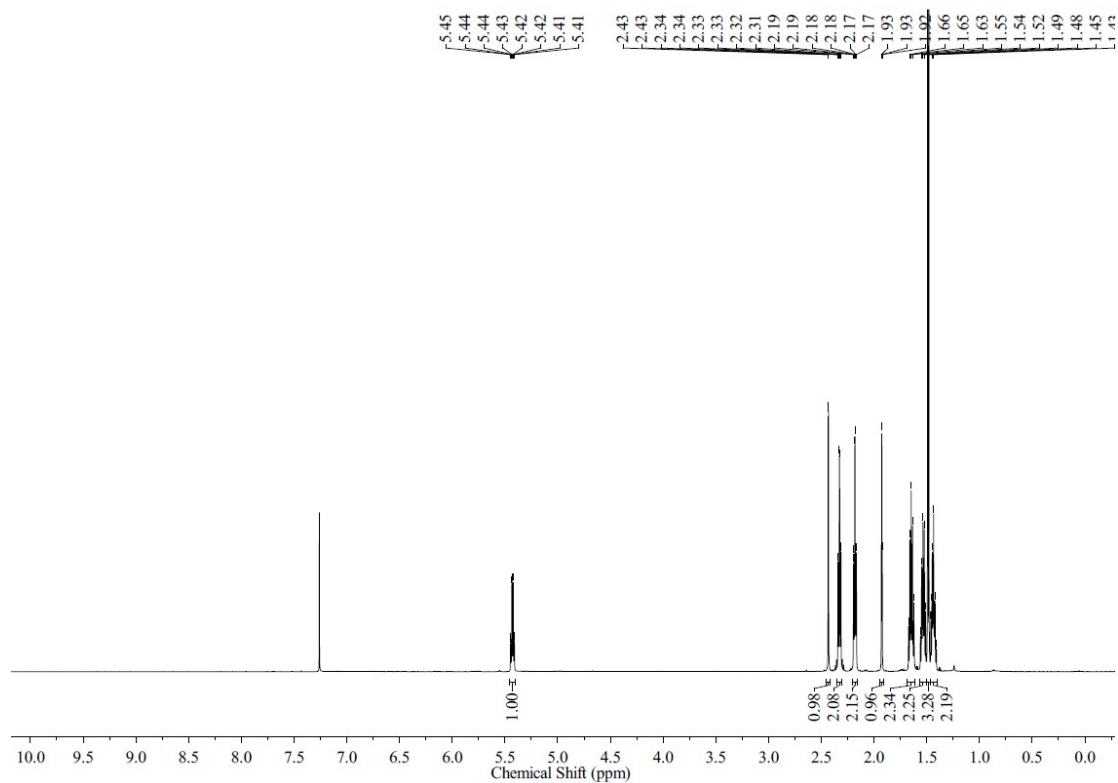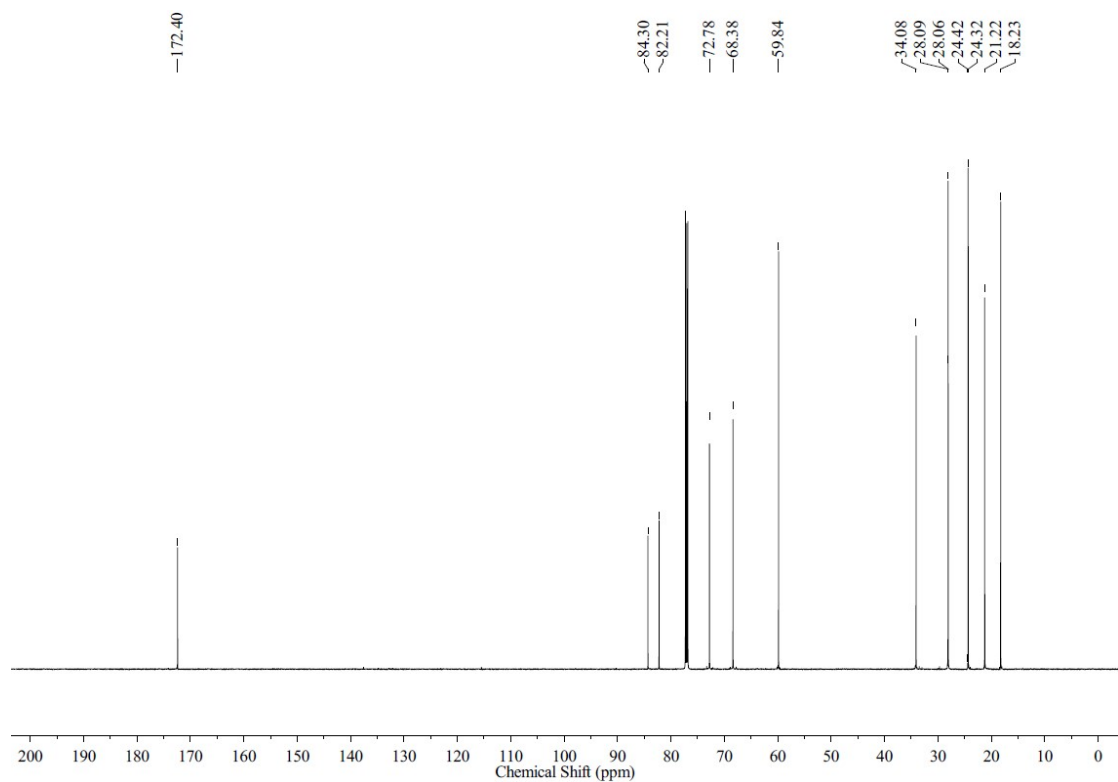

Fig. S10  $^1\text{H}$  NMR and  $^{13}\text{C}$  NMR spectra of compound C1

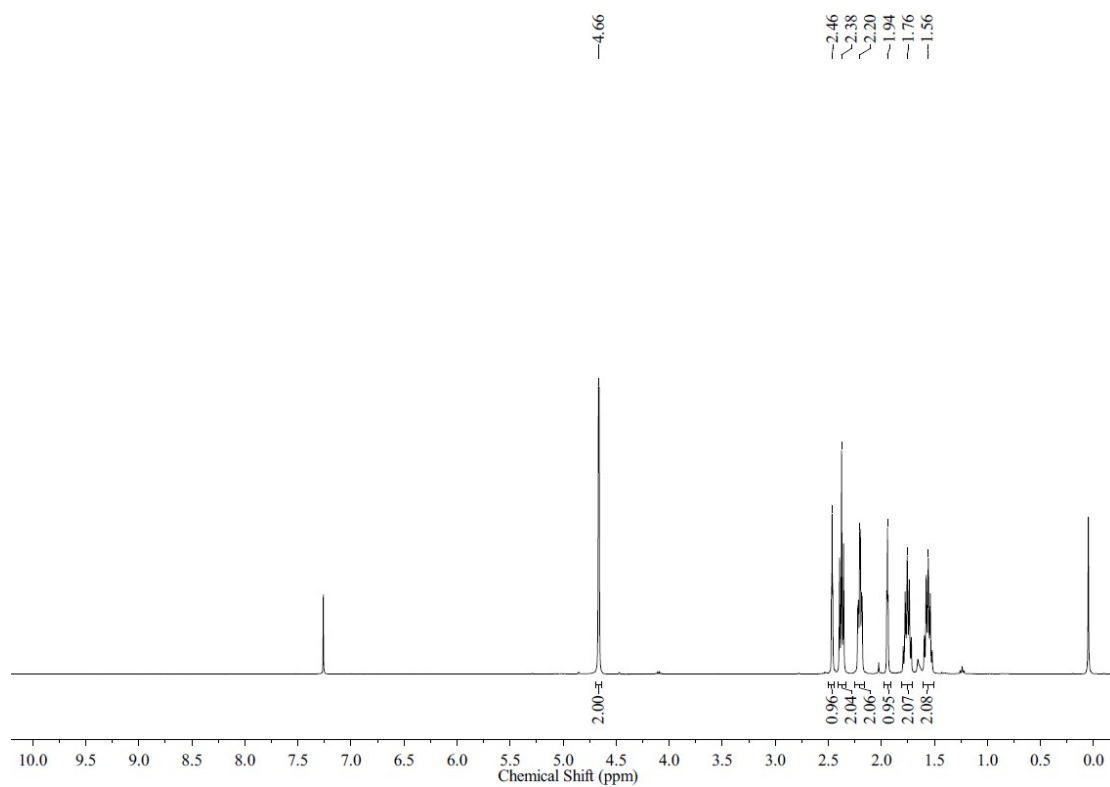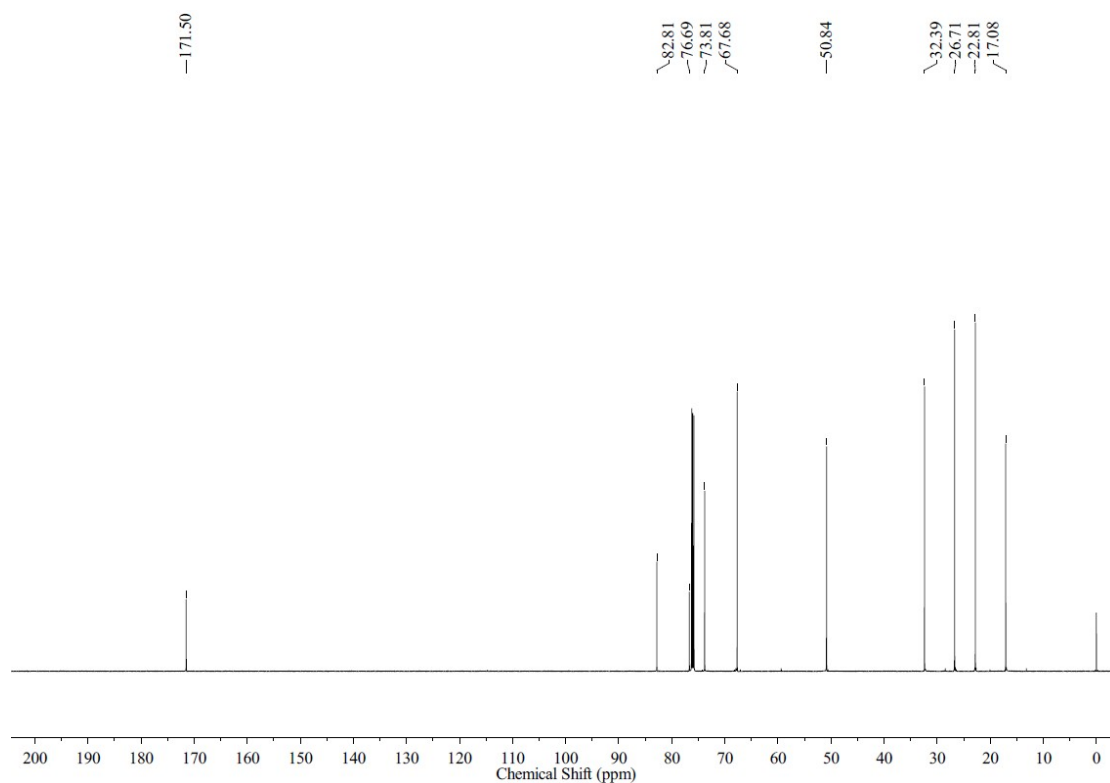

Fig. S11  $^1\text{H}$  NMR and  $^{13}\text{C}$  NMR spectra of compound D1



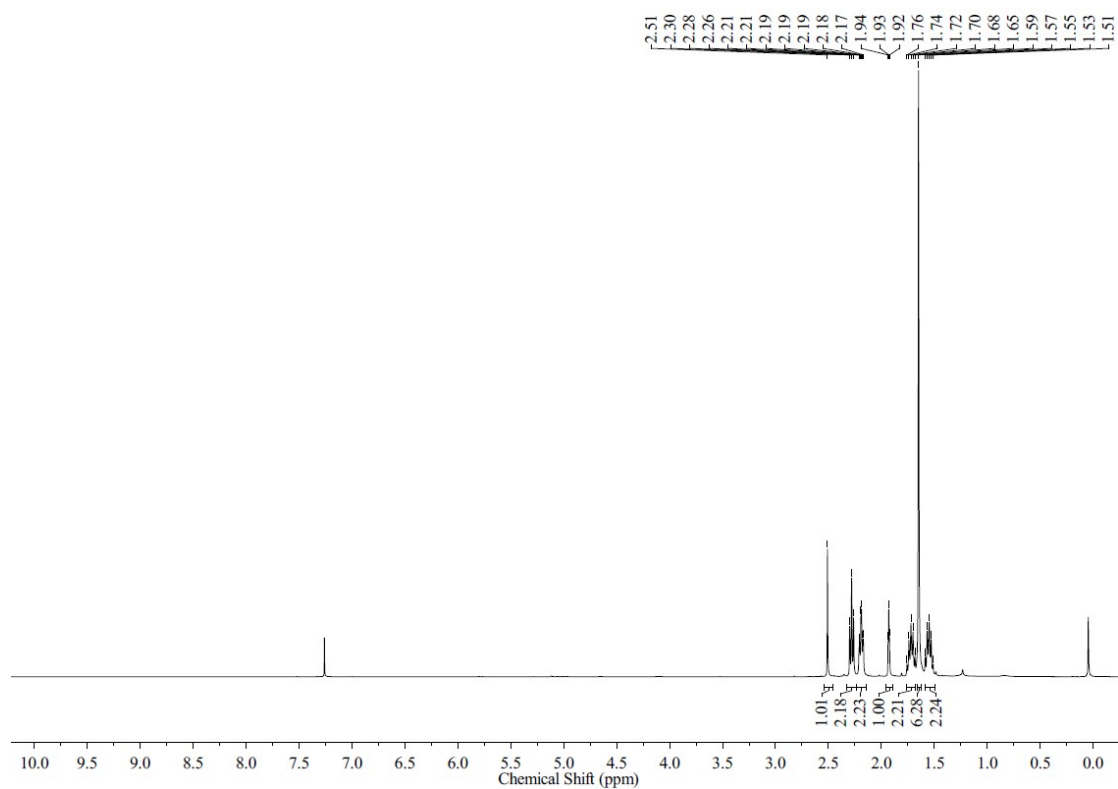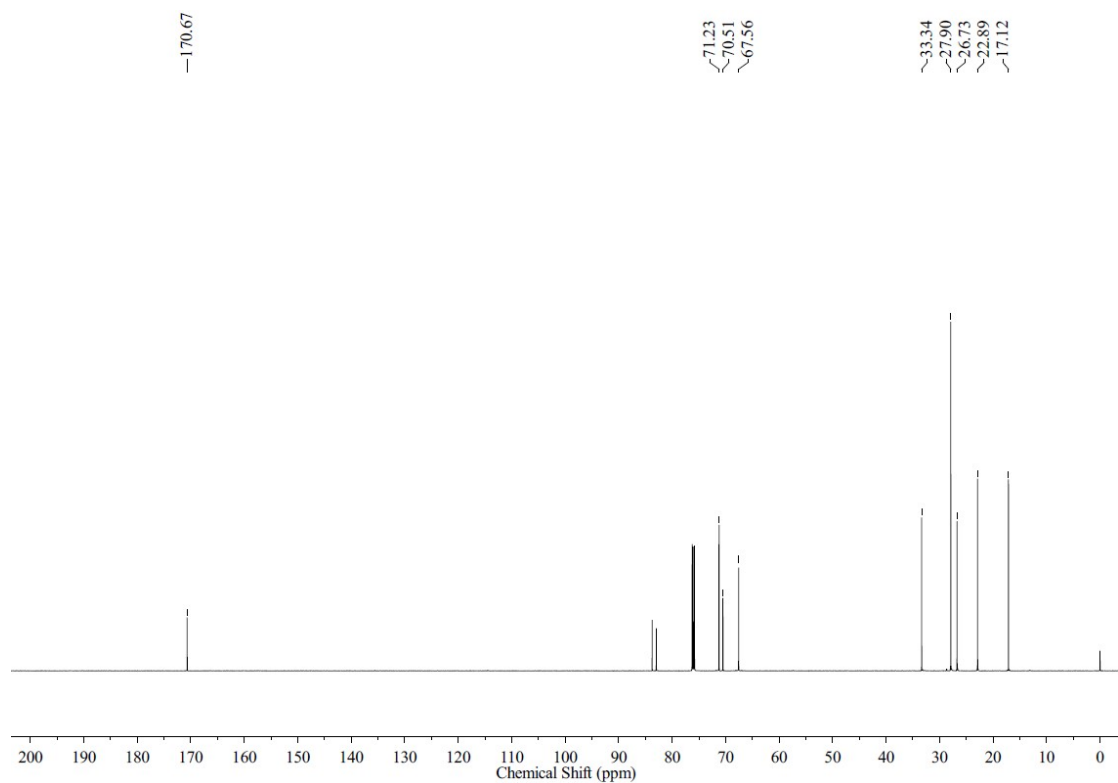

Fig. S12  $^1\text{H}$  NMR and  $^{13}\text{C}$  NMR spectra of compound E1

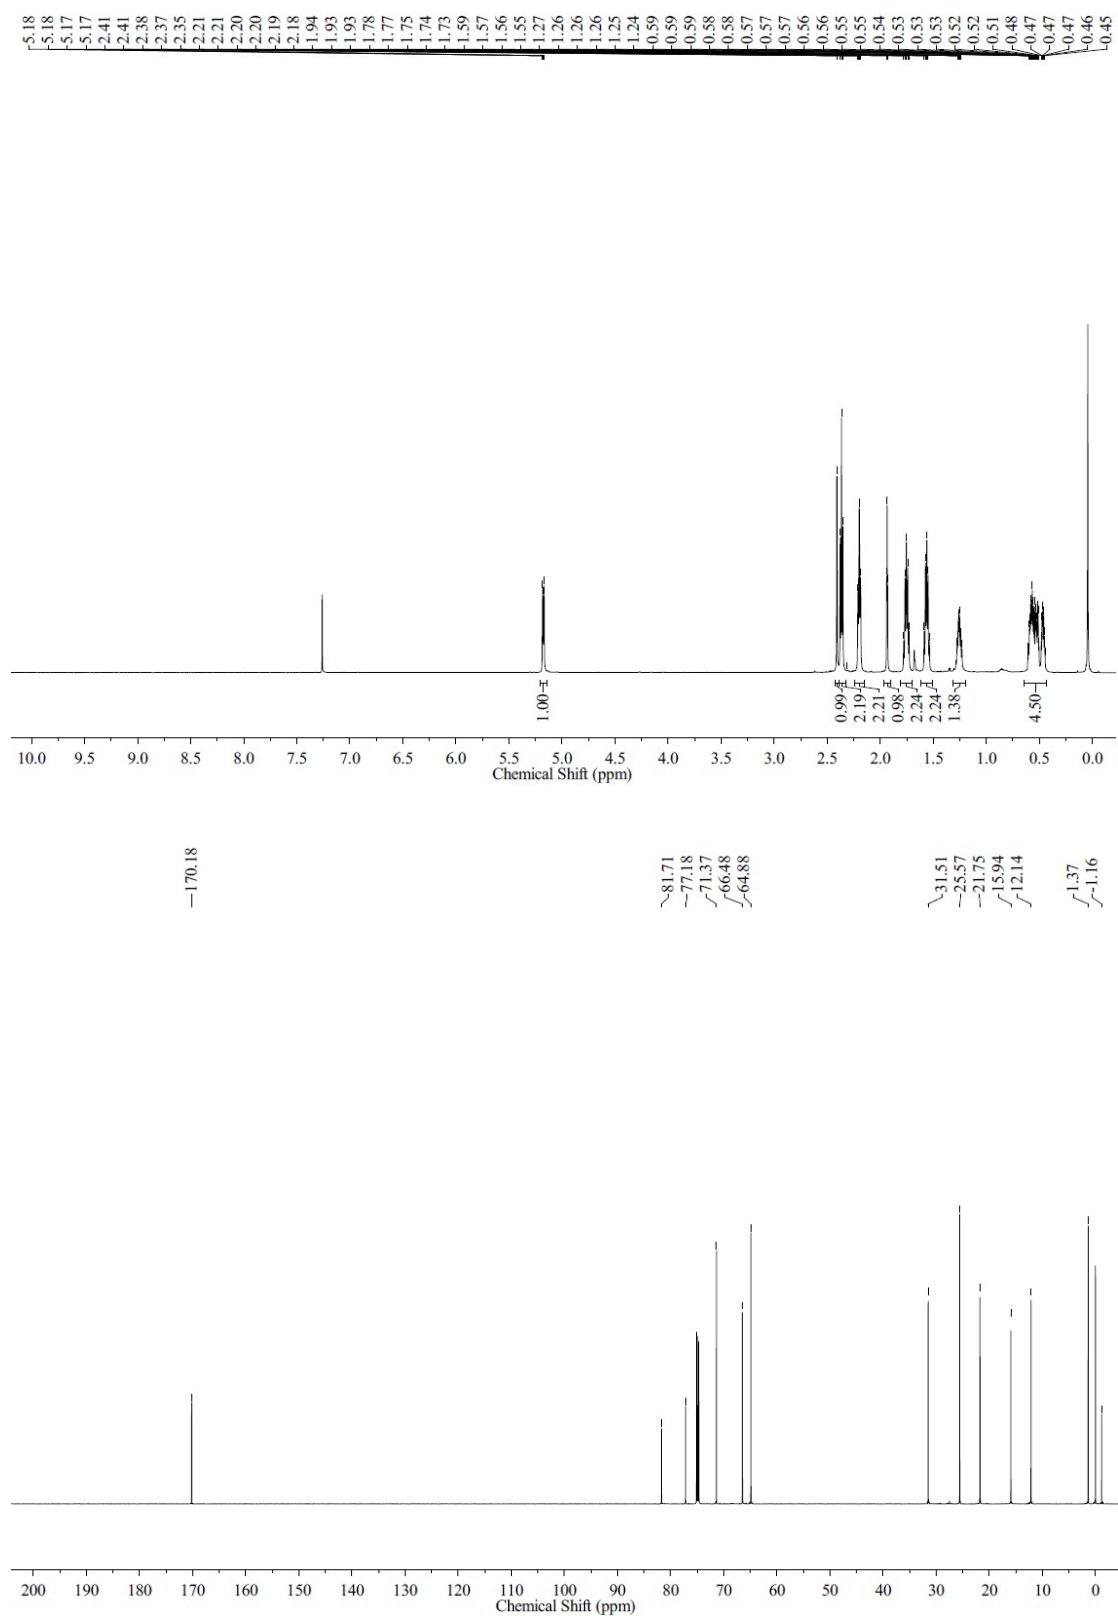

Fig. S13 <sup>1</sup>H NMR and <sup>13</sup>C NMR spectra of compound F1

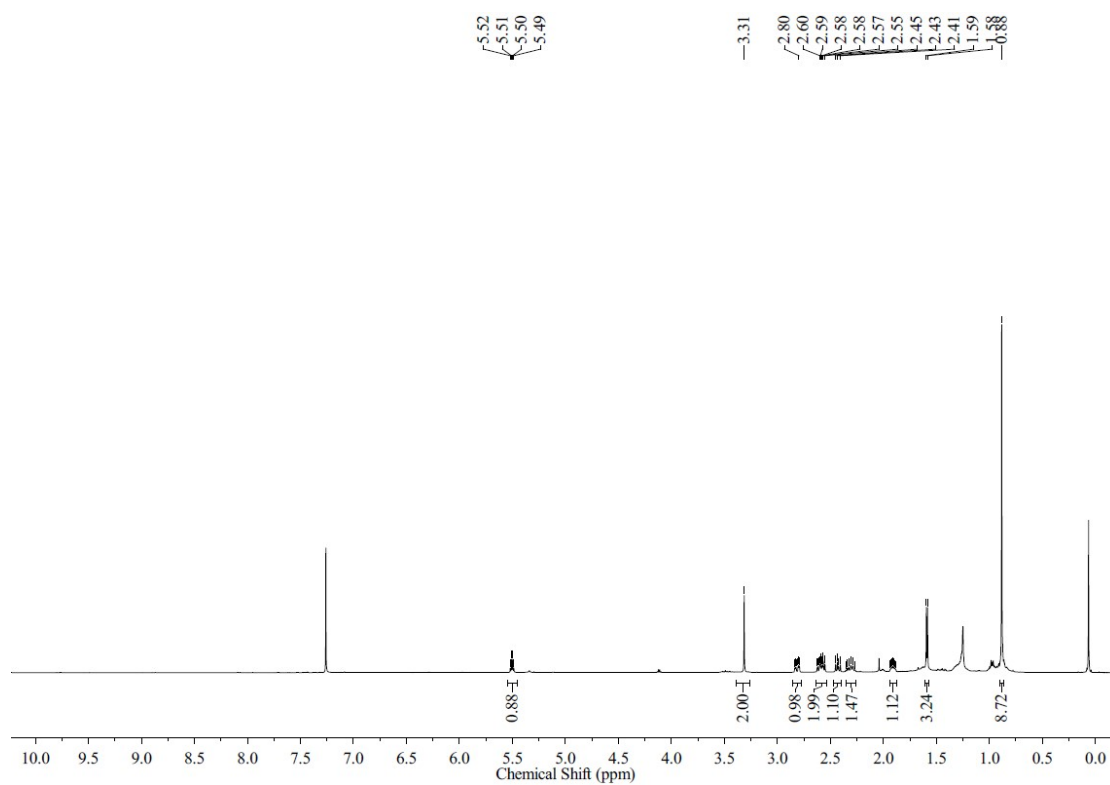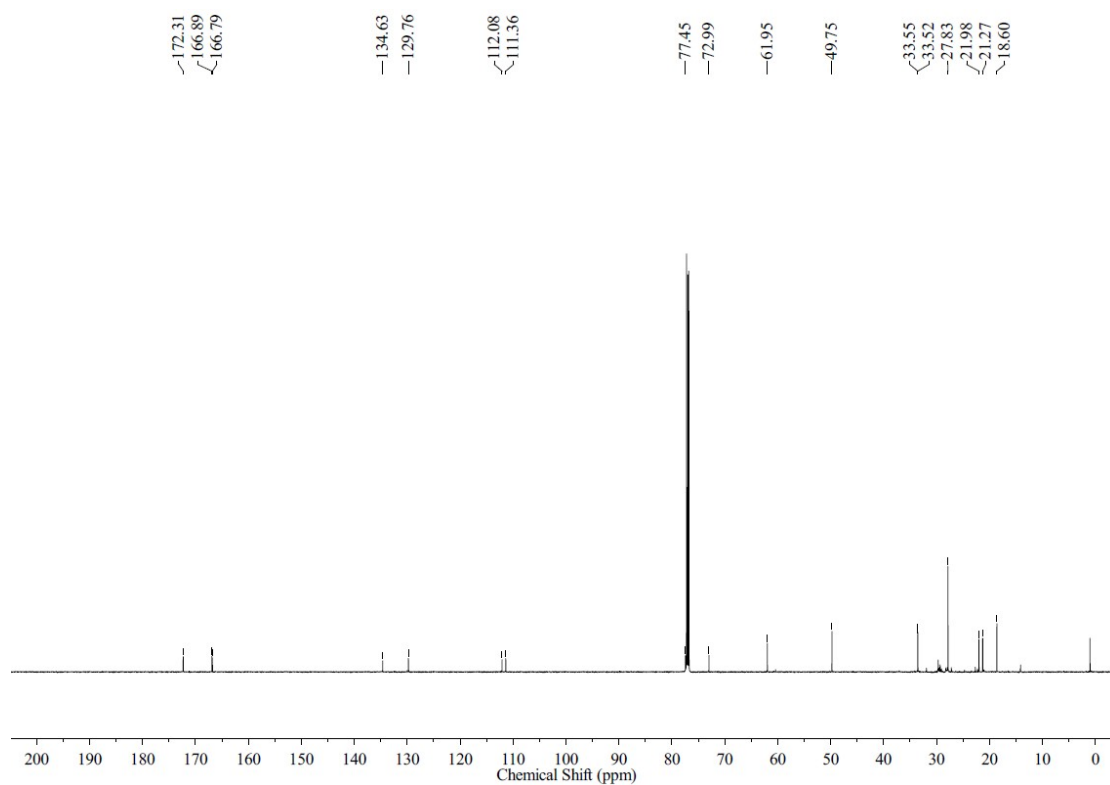

Fig. S14  $^1\text{H}$  NMR and  $^{13}\text{C}$  NMR spectra of compound EDY-A

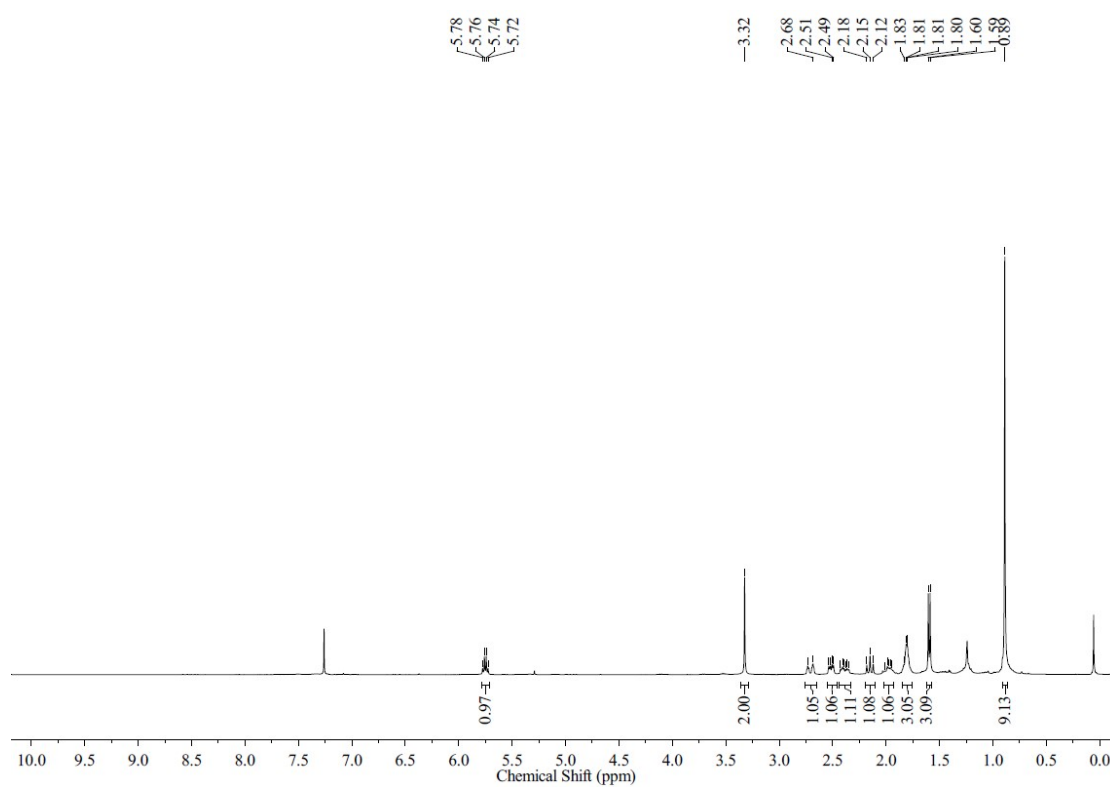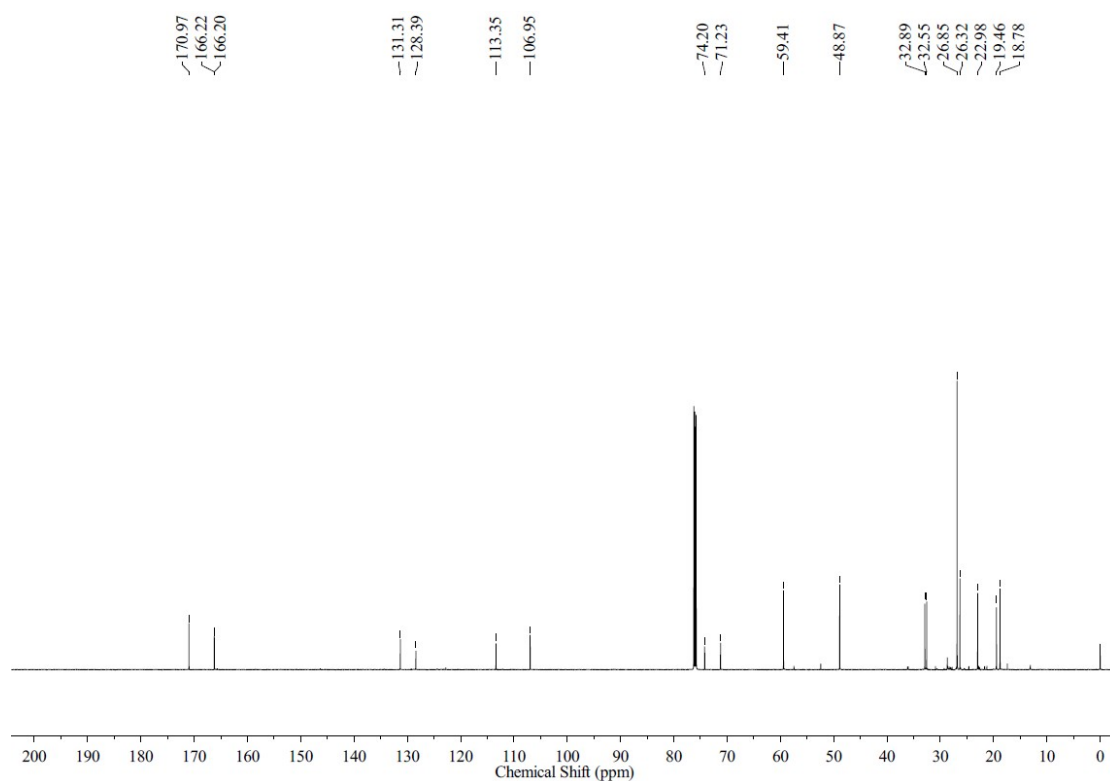

Fig. S15  $^1\text{H}$  NMR and  $^{13}\text{C}$  NMR spectra of compound EDY-B

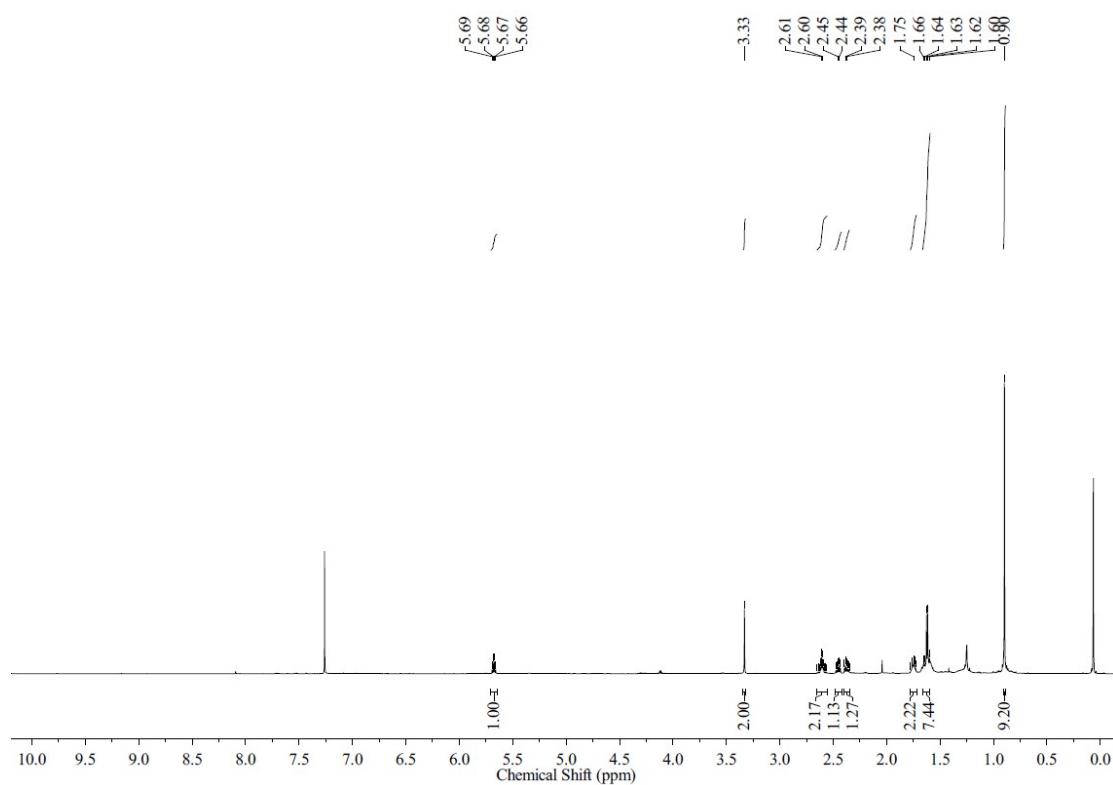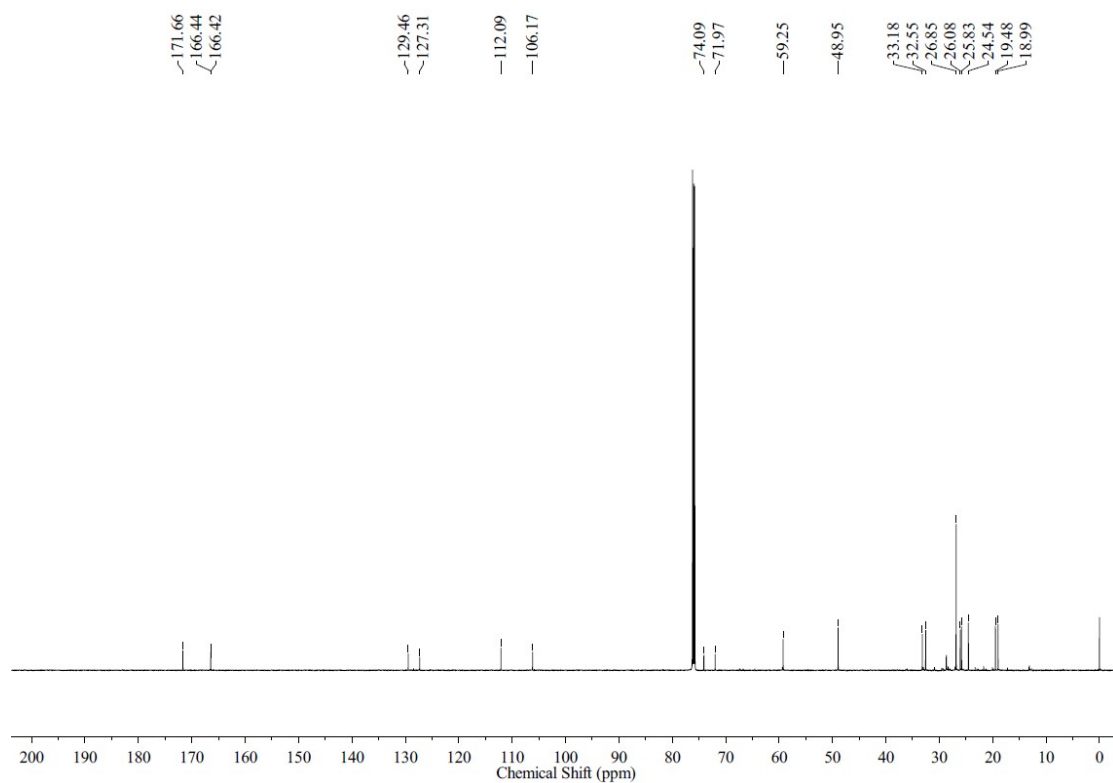

Fig. S16  $^1\text{H}$  NMR and  $^{13}\text{C}$  NMR spectra of compound EDY-C

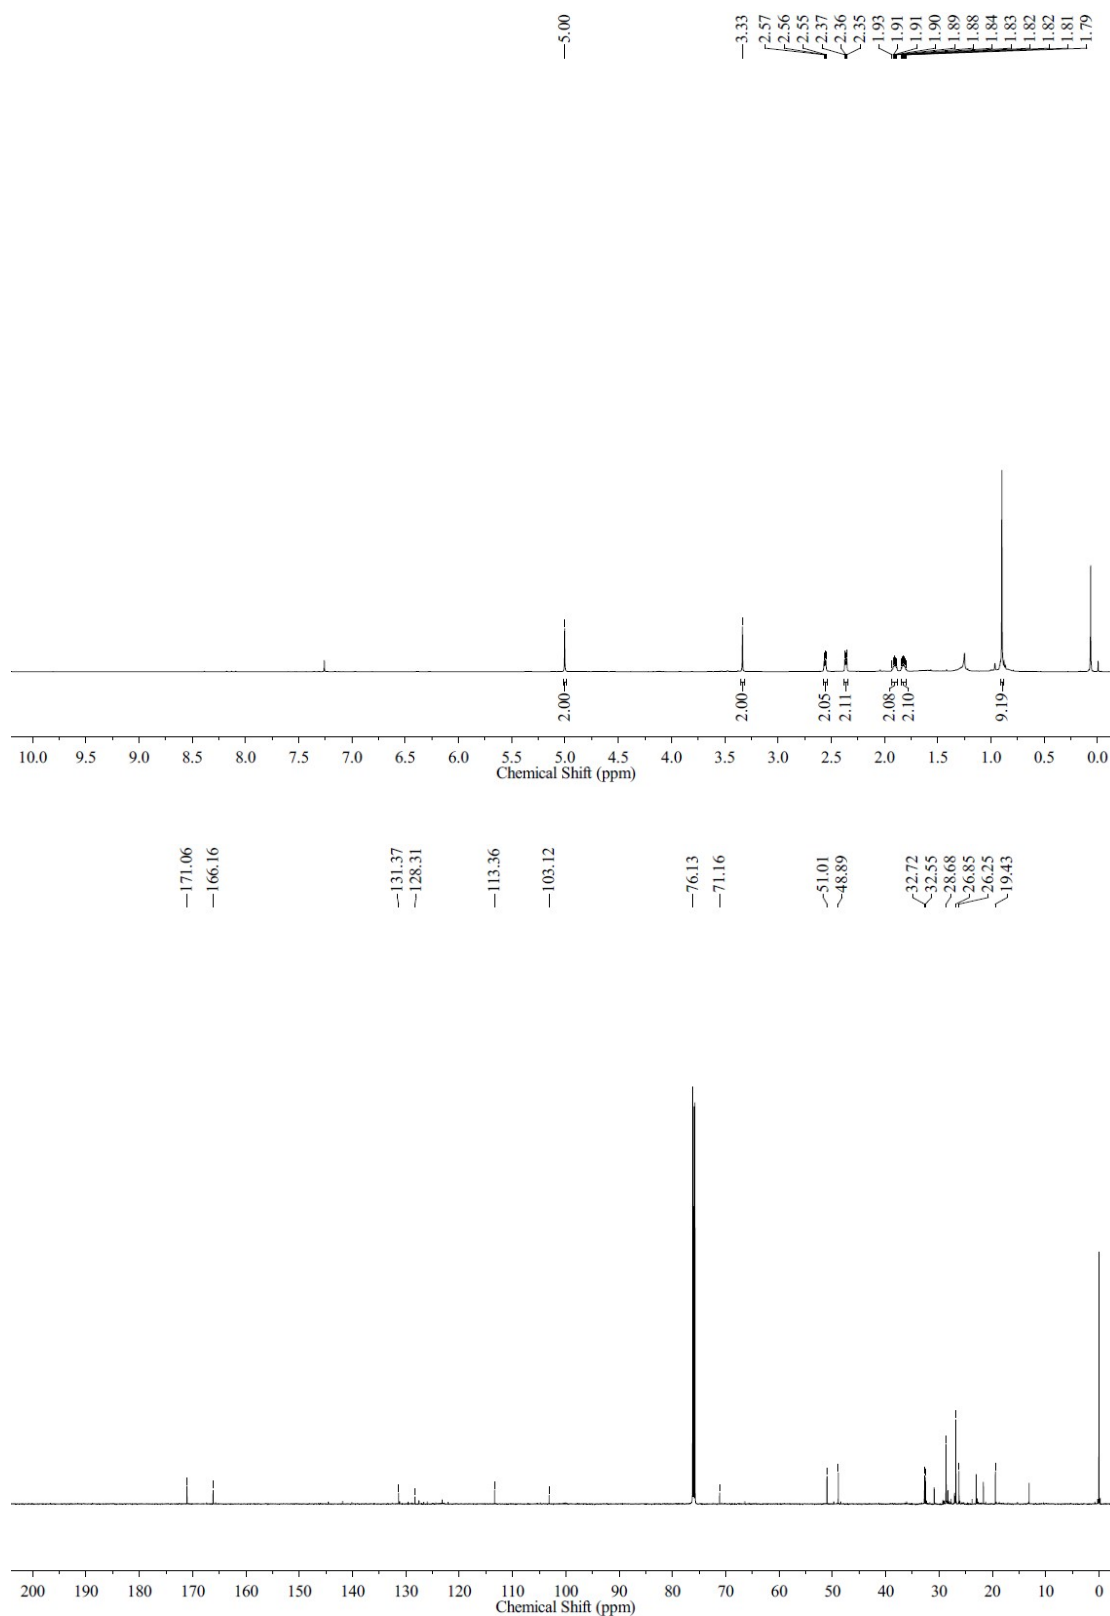

Fig. S17 <sup>1</sup>H NMR and <sup>13</sup>C NMR spectra of compound EDY-D

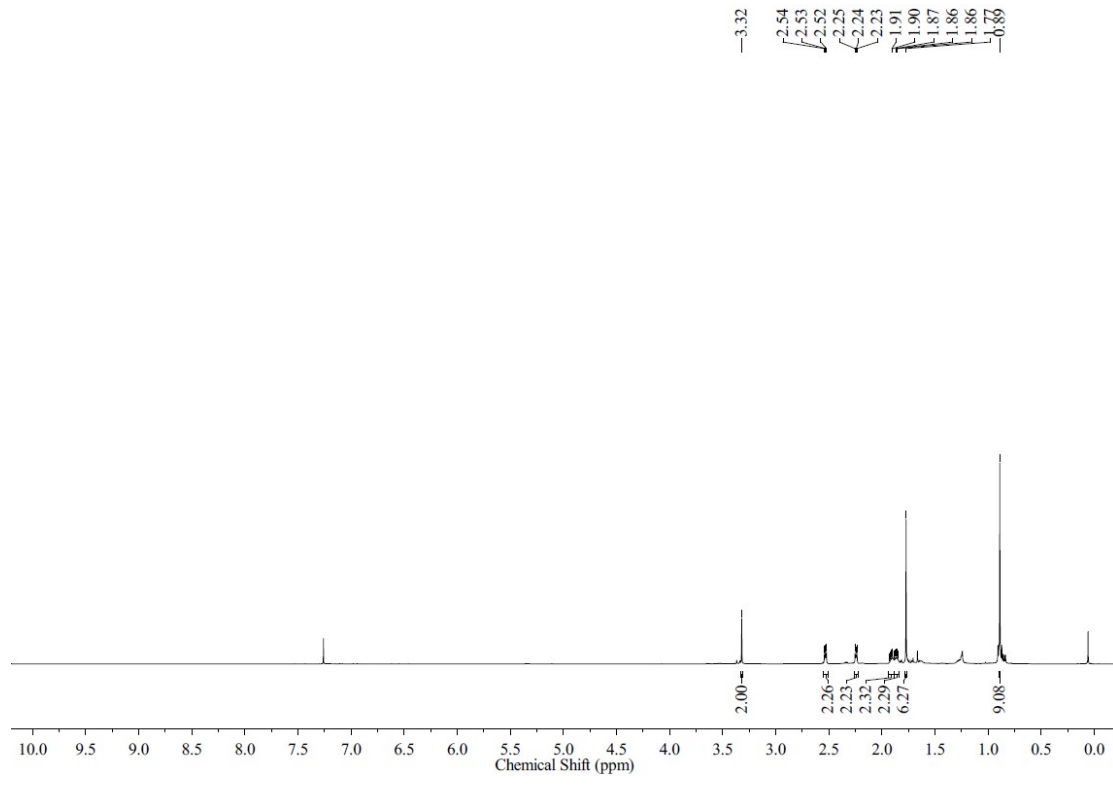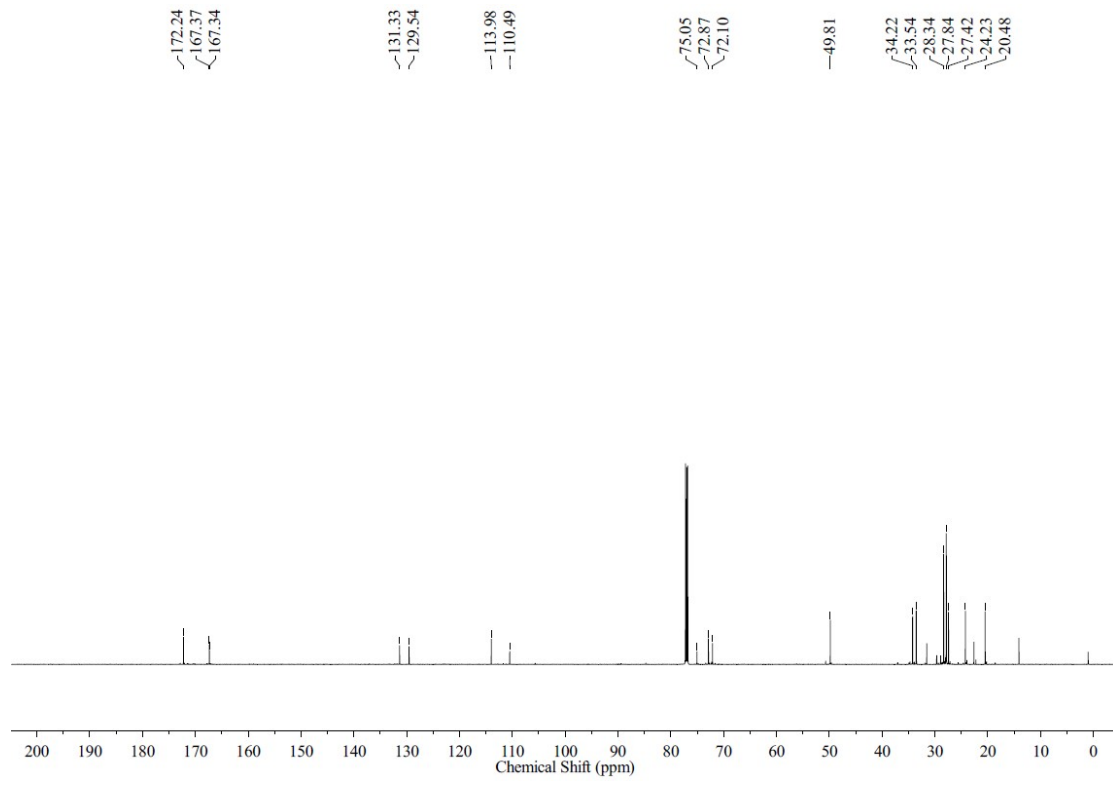

Fig. S18 <sup>1</sup>H NMR and <sup>13</sup>C NMR spectra of compound EDY-E

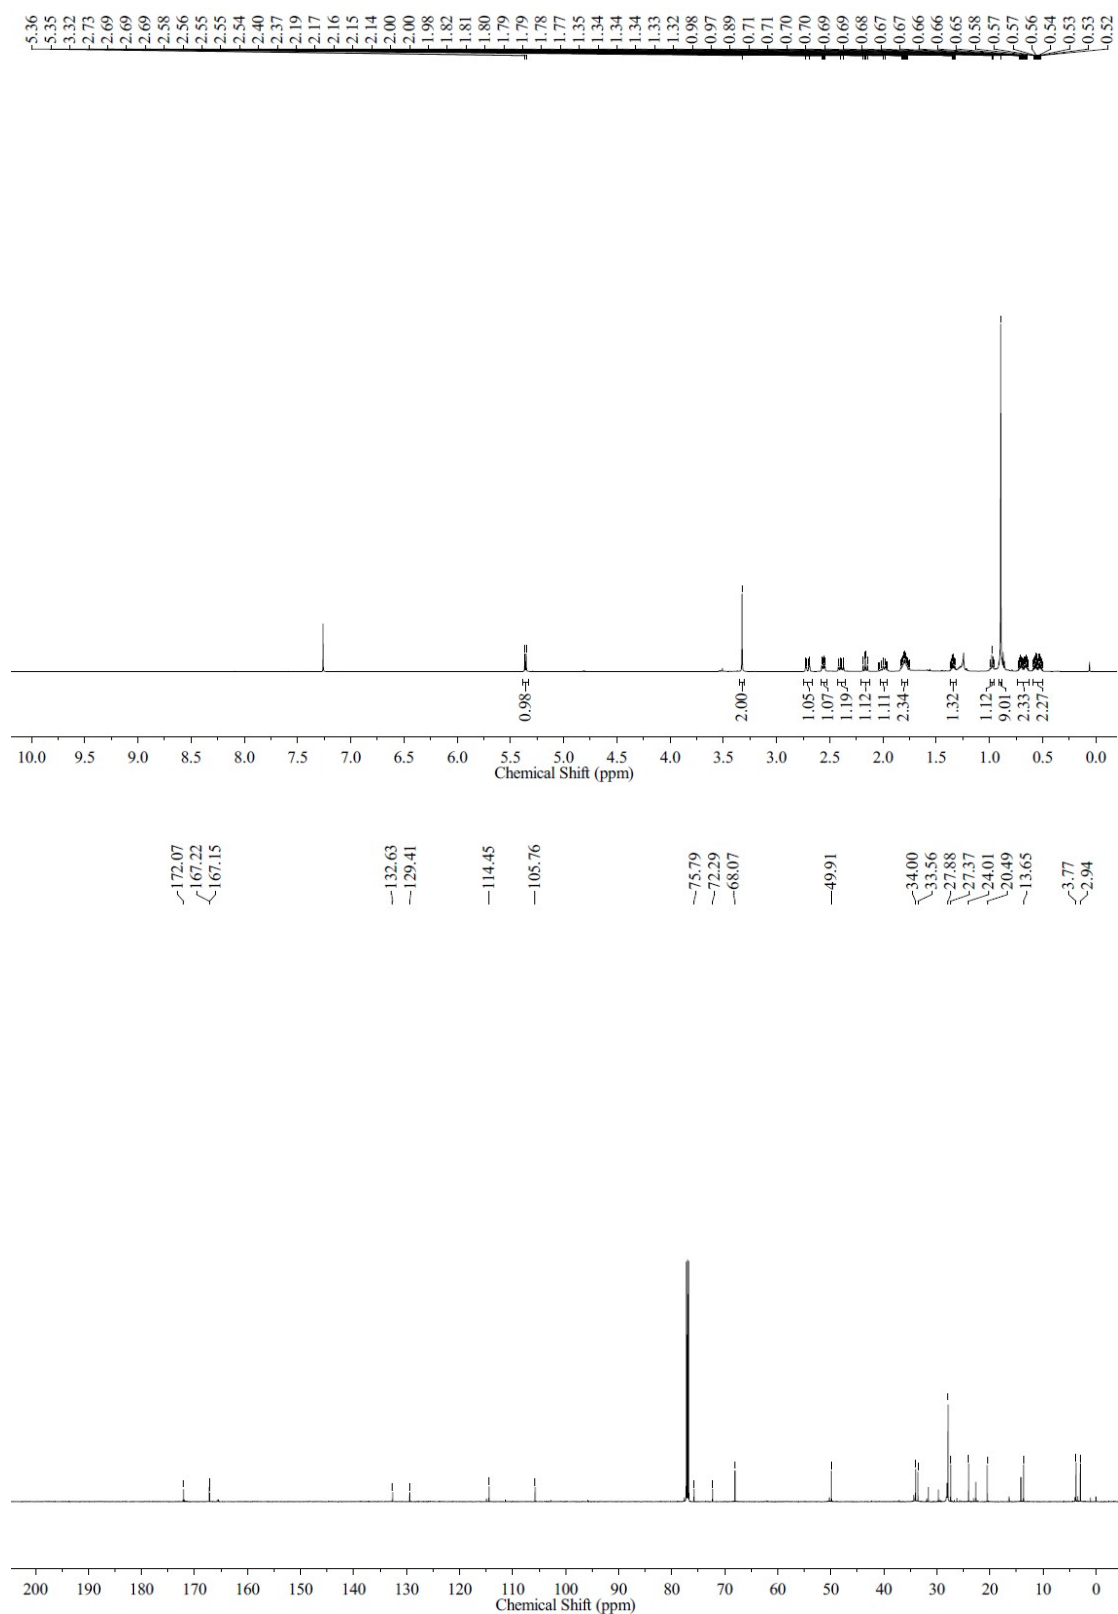

Fig. S19  $^1\text{H}$  NMR and  $^{13}\text{C}$  NMR spectra of compound EDY-F



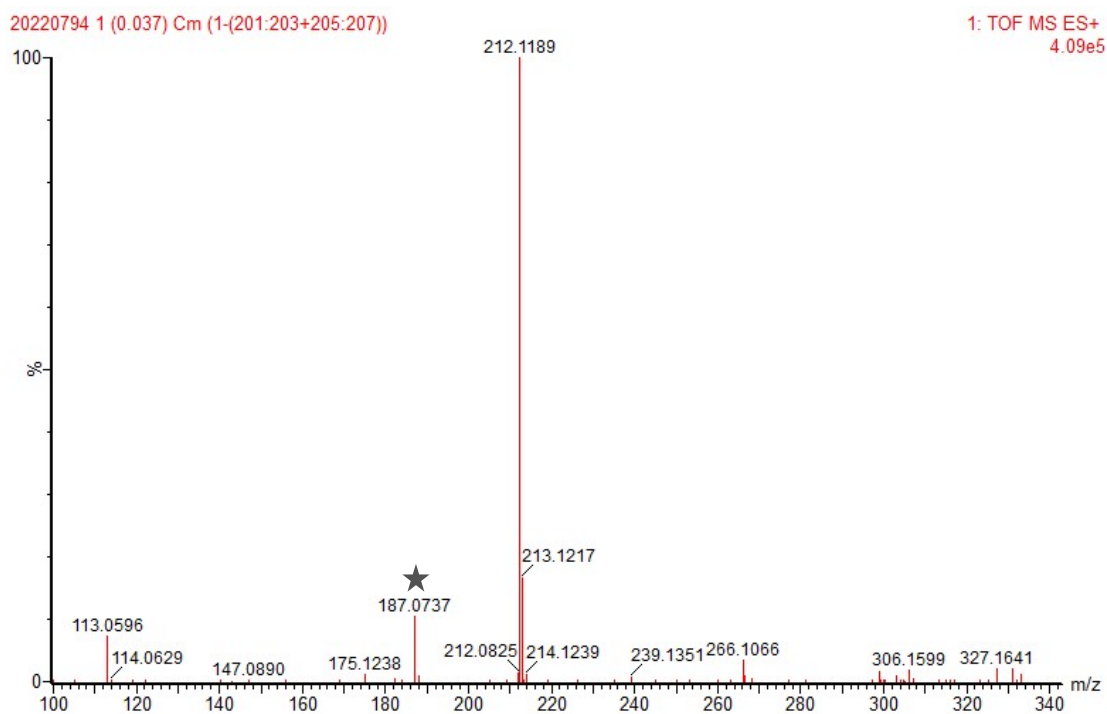

Fig. S20 HR-MS spectrum of A1

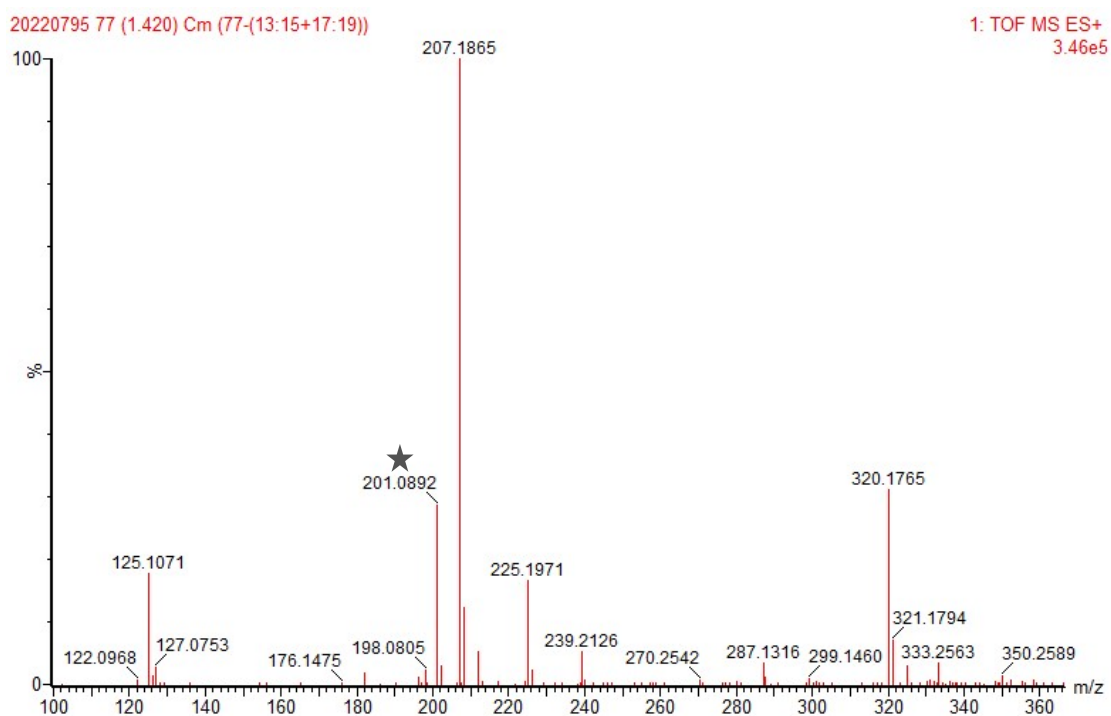

Fig. S21 HR-MS spectrum of B1

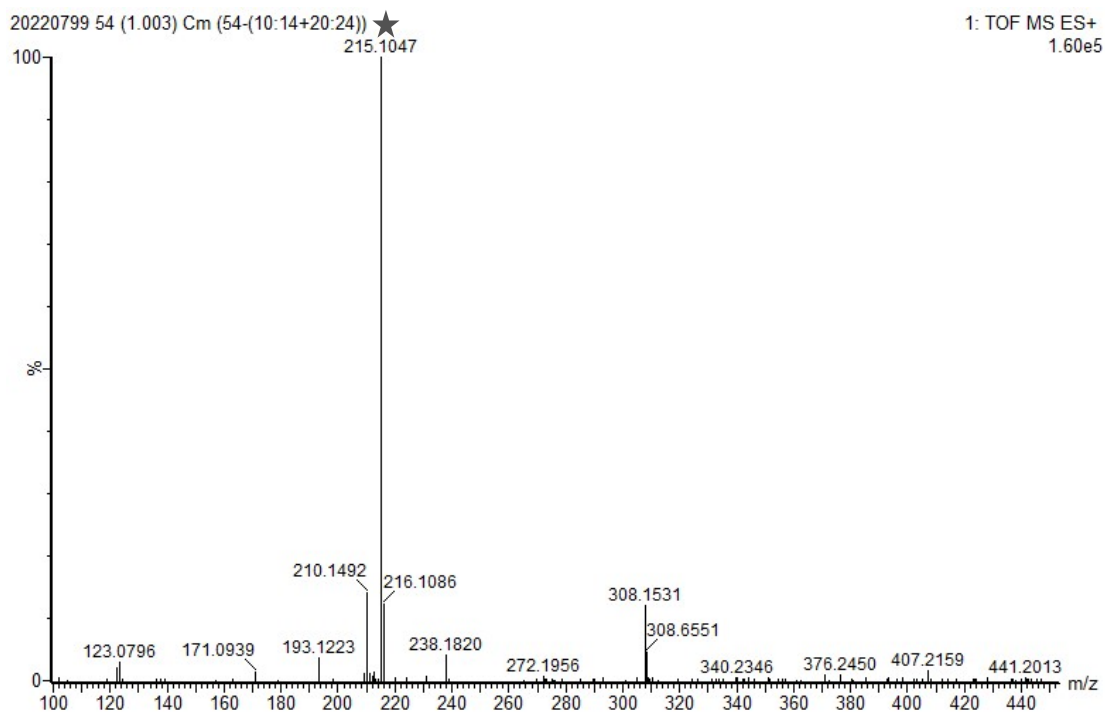

Fig. S22 HR-MS spectrum of C1

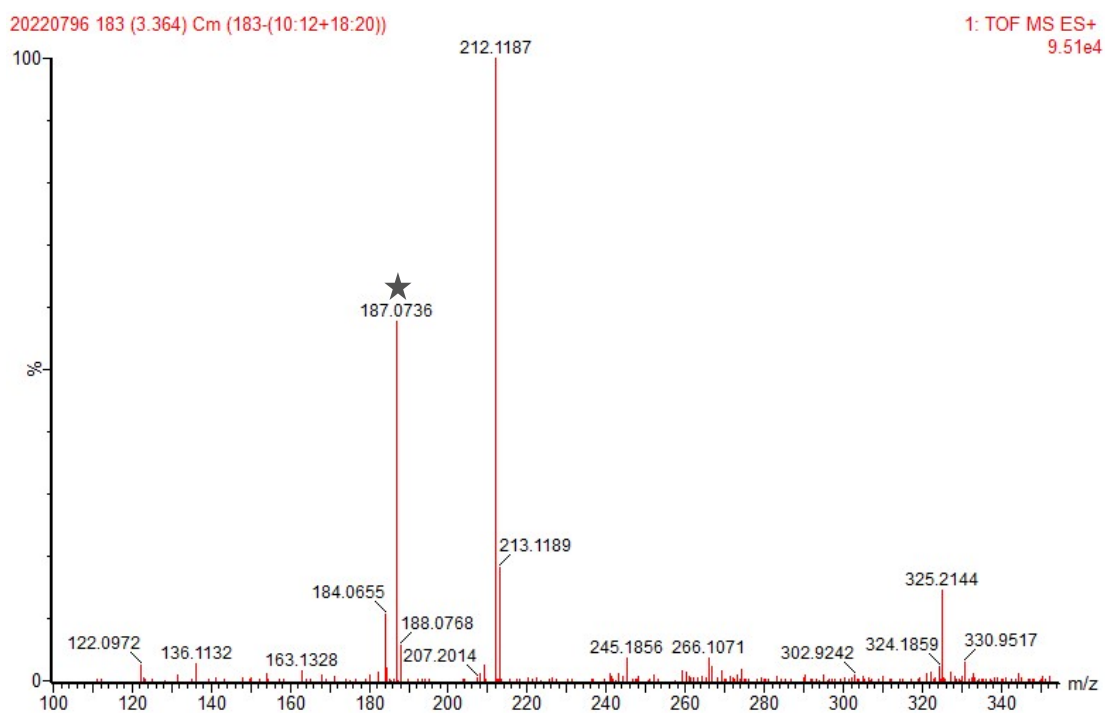

Fig. S23 HR-MS spectrum of D1

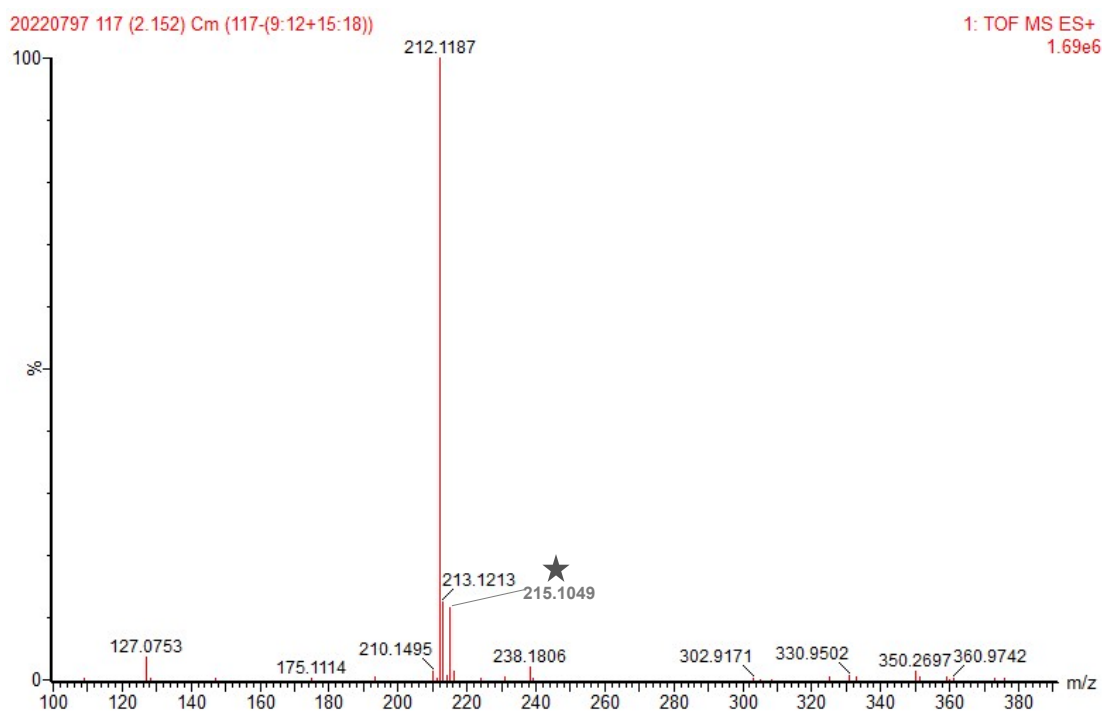

Fig. S24 HR-MS spectrum of E1

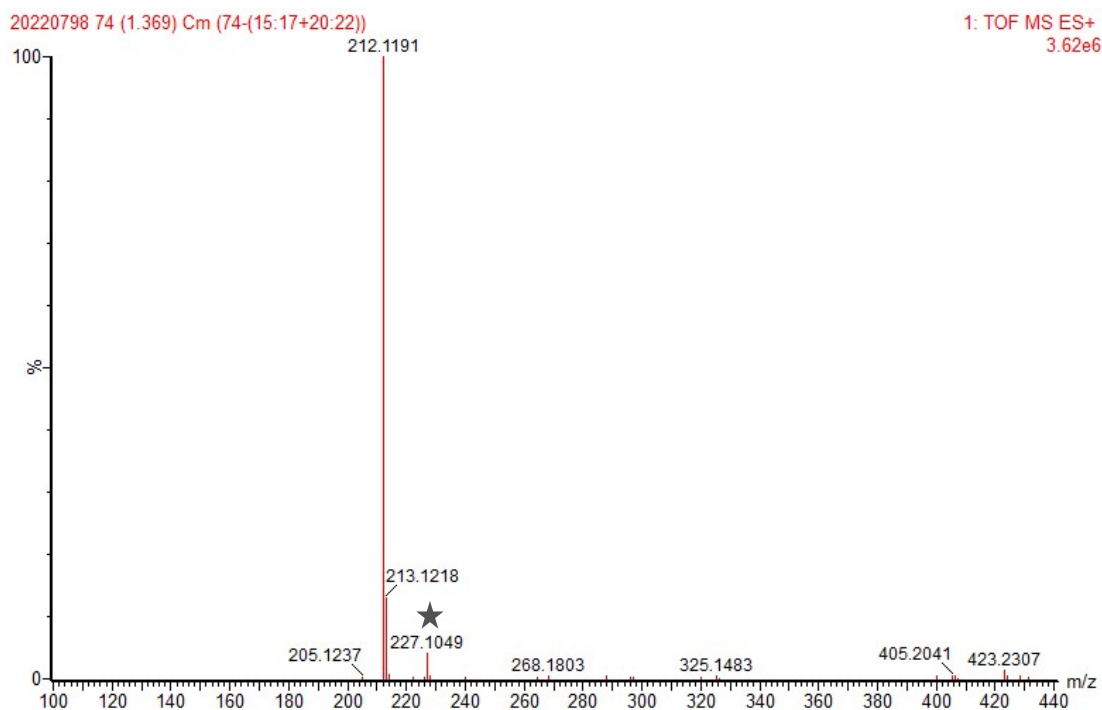

Fig. S25 HR-MS spectrum of F1

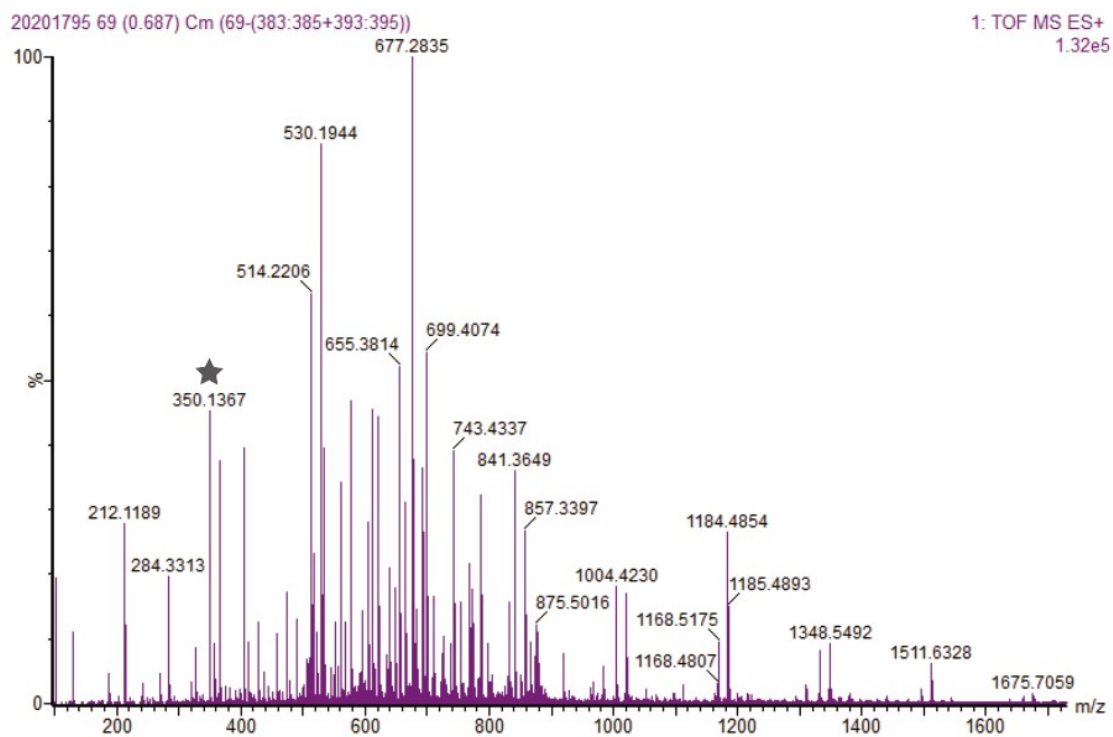

Fig. S26 HR-MS spectrum of EDY-A

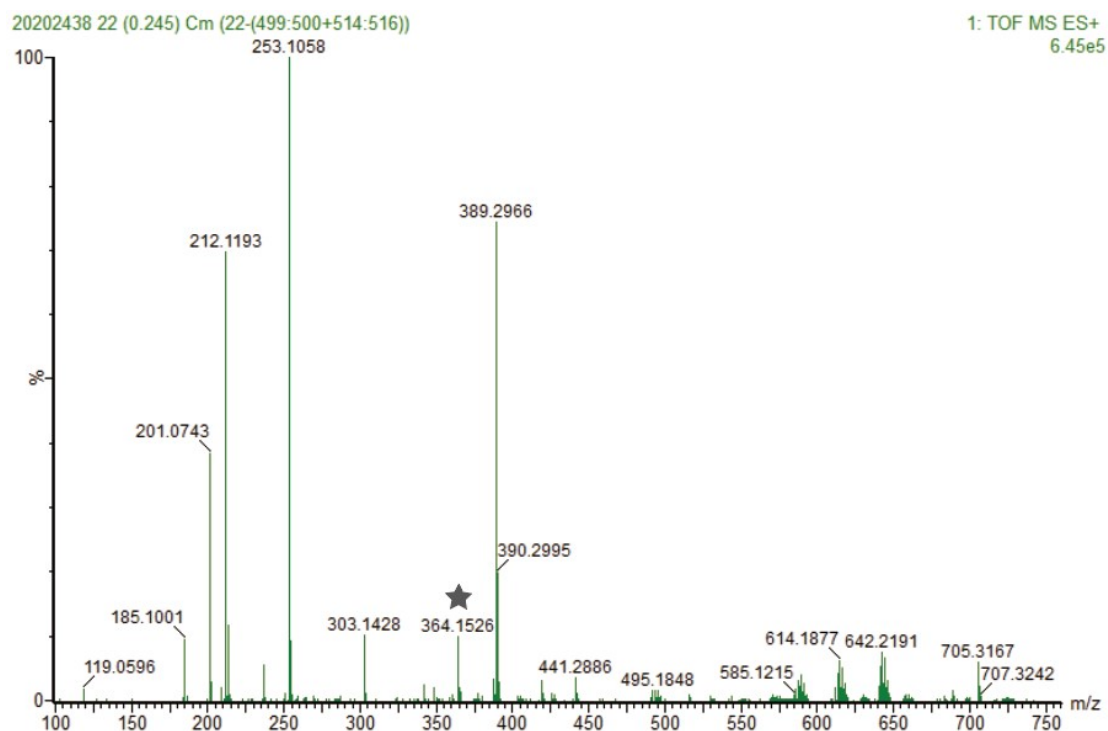

Fig. S27 HR-MS spectrum of EDY-B

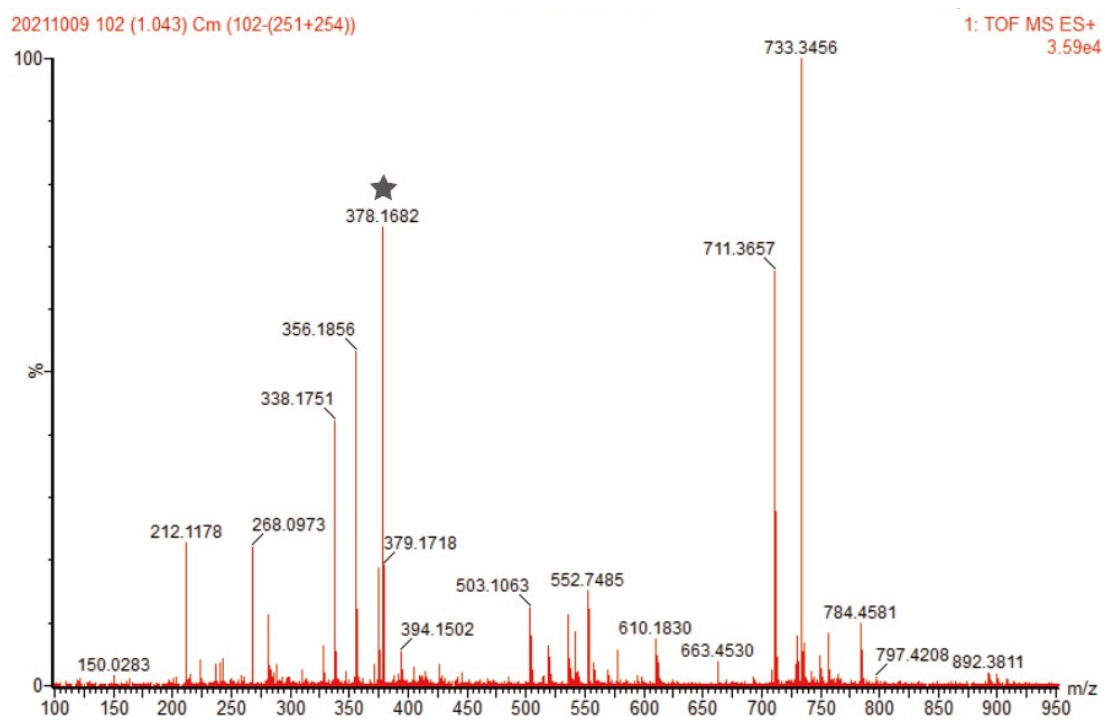

Fig. S28 HR-MS spectrum of EDY-C

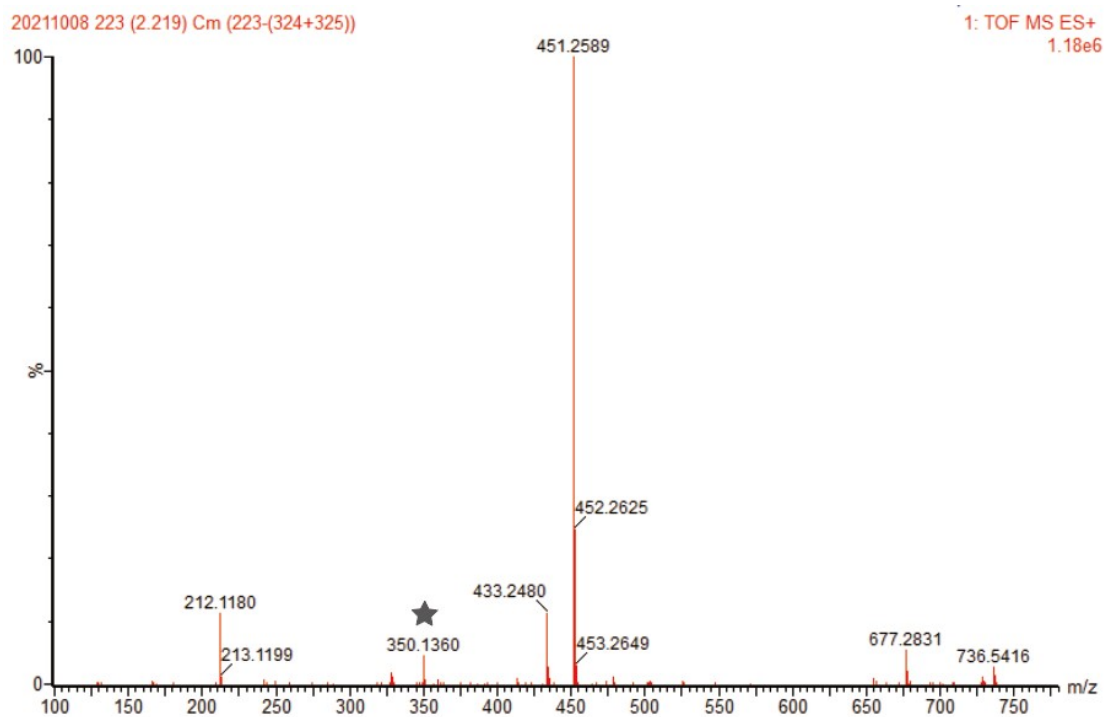

Fig. S29 HR-MS spectrum of EDY-D

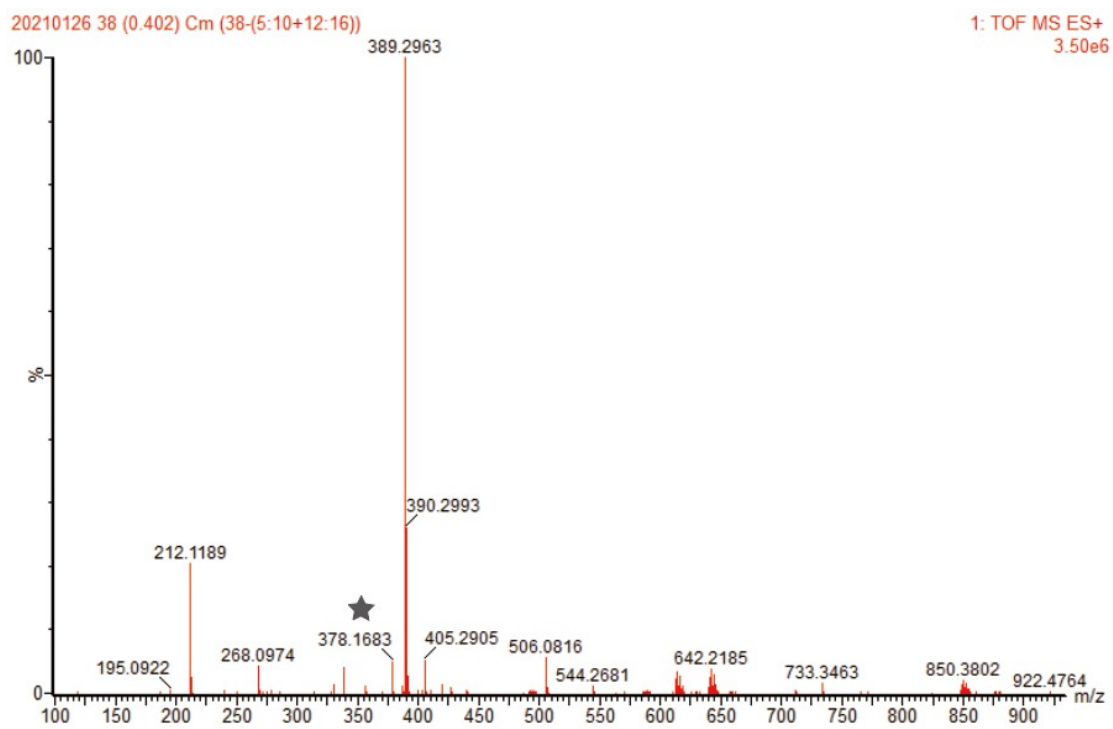

Fig. S30 HR-MS spectrum of EDY-E

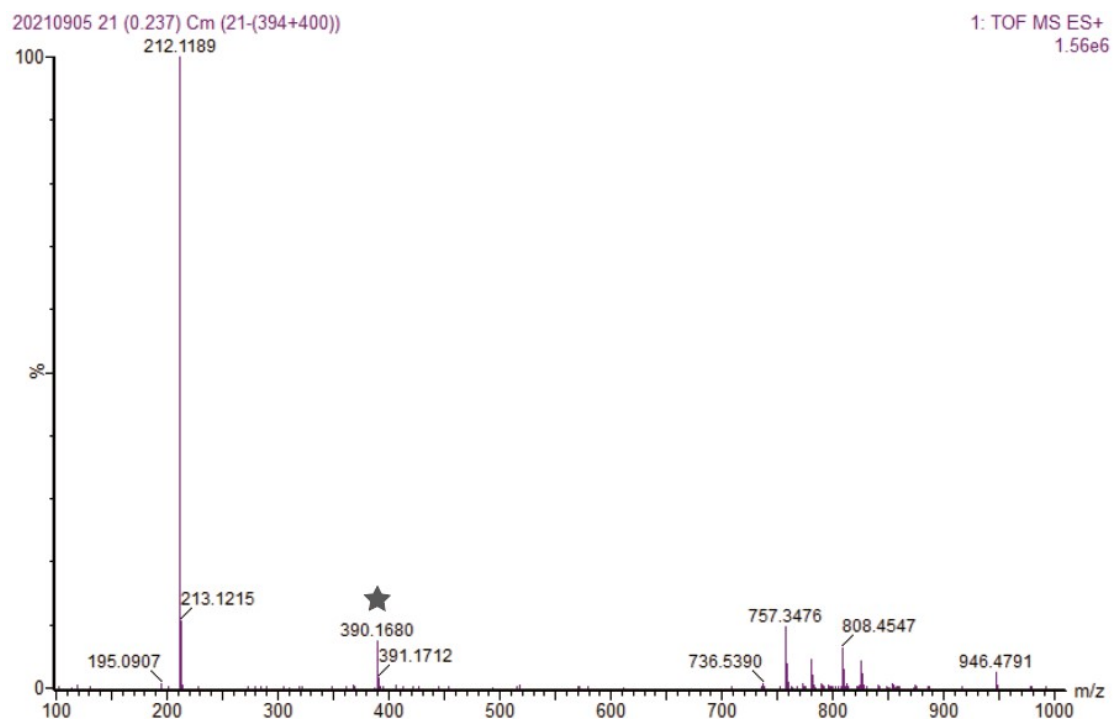

Fig. S31 HR-MS spectrum of EDY-F

## Computational Details

Below is a list of the calculated total energies and Gibbs free energy in atomic unit at (U)B3LYP/631G(d) as well as the Cartesian coordinates of all the optimized structures. The nature of the stationary point was characterized by vibrational frequency analysis. The Gaussian 09<sup>9</sup> package was employed to perform all the calculations.

Table S4 Cartesian Coordinates of stationary points for model compound EDY-B in the rearrangement and cycloaromatization process, Absolute Energies (A.U.).

| EDY-B                           |   |          |          | EDY-B                           |    |   |          |          |          |
|---------------------------------|---|----------|----------|---------------------------------|----|---|----------|----------|----------|
| <b>I</b>                        |   |          |          | <b>TS1</b>                      |    |   |          |          |          |
| E(RB3LYP) = -1617.95406427 A.U. |   |          |          | E(RB3LYP) = -1617.93610119 A.U. |    |   |          |          |          |
| G(298.15 K) = -1617.691661 A.U. |   |          |          | G(298.15 K) = -1617.678163 A.U. |    |   |          |          |          |
| Imaginary frequency = 0         |   |          |          | Imaginary frequency = 1         |    |   |          |          |          |
| 1                               | C | -1.98238 | -1.28971 | 0.44067                         | 1  | C | -0.85477 | 2.22301  | -0.07146 |
| 2                               | C | -0.13405 | -2.85293 | -0.51756                        | 2  | C | 1.31495  | 2.56713  | -1.4752  |
| 3                               | C | 0.80619  | 0.71913  | 1.39744                         | 3  | C | 0.71553  | -0.85467 | 0.79857  |
| 4                               | C | -2.86071 | 0.73787  | 1.15945                         | 4  | C | -2.37385 | 1.12331  | 1.30754  |
| 5                               | C | -3.45442 | -1.26011 | 0.17046                         | 5  | C | -2.11977 | 3.01819  | 0.00988  |
| 6                               | N | -3.9114  | -0.0282  | 0.65826                         | 6  | N | -2.97332 | 2.29862  | 0.85925  |
| 7                               | C | -5.25358 | 0.47873  | 0.47181                         | 7  | C | -4.34049 | 2.66815  | 1.15709  |
| 8                               | H | -5.85546 | -0.33158 | 0.05623                         | 8  | H | -4.54324 | 3.6114   | 0.64647  |
| 9                               | H | -5.67379 | 0.80608  | 1.42752                         | 9  | H | -5.02765 | 1.89452  | 0.80086  |
| 10                              | H | -5.24796 | 1.3289   | -0.21849                        | 10 | H | -4.4782  | 2.79126  | 2.23611  |
| 11                              | O | -4.15    | -2.09988 | -0.3672                         | 11 | O | -2.39432 | 4.07454  | -0.52607 |
| 12                              | O | -2.96629 | 1.87799  | 1.56915                         | 12 | O | -2.8898  | 0.312    | 2.0504   |
| 13                              | C | 1.07849  | -3.4476  | -1.06453                        | 13 | C | 2.60361  | 2.46954  | -2.15225 |
| 14                              | H | 1.64877  | -3.90461 | -0.24325                        | 14 | H | 2.62547  | 1.51506  | -2.69694 |
| 15                              | H | 0.82963  | -4.26549 | -1.75441                        | 15 | H | 2.70969  | 3.25833  | -2.90897 |
| 16                              | C | 3.73531  | -0.46503 | 1.09511                         | 16 | C | 3.81805  | -0.73666 | 0.94738  |
| 17                              | O | 4.90677  | -0.72207 | 1.28393                         | 17 | O | 4.84179  | -0.58961 | 1.58308  |
| 18                              | O | 3.26737  | 0.71037  | 1.5869                          | 18 | O | 2.93352  | -1.66698 | 1.36993  |
| 19                              | C | 2.80156  | -1.4672  | 0.42904                         | 19 | C | 3.54649  | 0.10744  | -0.30056 |
| 20                              | H | 1.92288  | -1.61765 | 1.06569                         | 20 | H | 2.56656  | -0.076   | -0.74253 |
| 21                              | H | 3.3841   | -2.39449 | 0.42595                         | 21 | H | 4.3074   | -0.18902 | -1.03574 |
| 22                              | C | -1.07358 | -2.23201 | -0.06435                        | 22 | C | 0.27412  | 2.52275  | -0.85195 |
| 23                              | C | -0.3428  | 0.32996  | 1.3438                          | 23 | C | -0.08085 | 0.0602   | 0.85749  |
| 24                              | C | -1.63328 | -0.12415 | 1.06153                         | 24 | C | -1.00164 | 1.0968   | 0.69355  |
| 25                              | C | 2.07044  | 1.40236  | 1.12579                         | 25 | C | 1.67342  | -1.95029 | 0.67283  |
| 26                              | C | 1.97761  | -2.4144  | -1.80126                        | 26 | C | 3.80533  | 2.53111  | -1.17521 |
| 27                              | H | 1.47957  | -2.11463 | -2.73037                        | 27 | H | 3.91059  | 3.56214  | -0.81387 |
| 28                              | H | 2.89663  | -2.94808 | -2.08323                        | 28 | H | 4.71301  | 2.3019   | -1.75085 |
| 29                              | C | 2.3328   | -1.14247 | -1.00763                        | 29 | C | 3.71222  | 1.60014  | 0.04123  |
| 30                              | H | 3.12664  | -0.62049 | -1.55507                        | 30 | H | 4.61951  | 1.71356  | 0.64336  |

|                                 |   |          |          |          |                                 |   |          |          |          |
|---------------------------------|---|----------|----------|----------|---------------------------------|---|----------|----------|----------|
| 31                              | H | 1.48356  | -0.45462 | -1.00094 | 31                              | H | 2.86625  | 1.90714  | 0.66791  |
| 32                              | P | -0.35541 | 2.39899  | -1.68173 | 32                              | P | 0.36463  | -5.48498 | 2.38122  |
| 33                              | O | -0.83208 | 3.28497  | -2.79571 | 33                              | O | -0.22742 | -6.59277 | 1.56742  |
| 34                              | O | -1.57358 | 1.23768  | -1.47997 | 34                              | O | 1.66098  | -6.10029 | 3.26315  |
| 35                              | H | -2.13306 | 1.37494  | -2.26009 | 35                              | H | 1.51911  | -7.05936 | 3.28126  |
| 36                              | O | -0.50117 | 3.13113  | -0.19163 | 36                              | O | -0.67952 | -5.17197 | 3.65068  |
| 37                              | H | -1.40356 | 3.01345  | 0.14588  | 37                              | H | -0.16072 | -4.8078  | 4.38592  |
| 38                              | O | 0.99619  | 1.73047  | -1.68837 | 38                              | O | 0.84993  | -4.18262 | 1.7933   |
| 39                              | C | 2.11667  | 2.78143  | 1.77918  | 39                              | C | 1.92206  | -2.18627 | -0.82853 |
| 40                              | H | 3.05616  | 3.27273  | 1.50837  | 40                              | H | 2.93486  | -2.49752 | -0.97773 |
| 41                              | H | 1.27317  | 3.36585  | 1.40446  | 41                              | H | 1.25905  | -2.94687 | -1.18463 |
| 42                              | H | 2.06339  | 2.69478  | 2.86989  | 42                              | H | 1.74502  | -1.27838 | -1.36639 |
| 43                              | H | 2.08464  | 1.51958  | 0.02929  | 43                              | H | 1.16238  | -3.14126 | 1.2024   |
| <b>EDY-B</b>                    |   |          |          |          | <b>EDY-B</b>                    |   |          |          |          |
| <b>II</b>                       |   |          |          |          | <b>TS2</b>                      |   |          |          |          |
| E(RB3LYP) = -1617.95699808 A.U. |   |          |          |          | E(RB3LYP) = -1617.93016456 A.U. |   |          |          |          |
| G(298.15 K) = -1617.697498 A.U. |   |          |          |          | G(298.15 K) = -1617.675719 A.U. |   |          |          |          |
| Imaginary frequency = 0         |   |          |          |          | Imaginary frequency = 1         |   |          |          |          |
| 1                               | C | -1.99079 | -1.41387 | 0.3191   | 1                               | C | -0.57039 | 2.68111  | -0.01679 |
| 2                               | C | -0.13289 | -3.08699 | -0.42896 | 2                               | C | 1.86775  | 3.44557  | 0.51905  |
| 3                               | C | 0.86359  | 0.68878  | 1.26949  | 3                               | C | 1.0203   | -0.52889 | -0.78894 |
| 4                               | C | -2.7635  | 0.73422  | 0.89106  | 4                               | C | -2.22773 | 1.17358  | -0.7399  |
| 5                               | C | -3.41552 | -1.3789  | 0.15341  | 5                               | C | -1.83389 | 3.35873  | -0.01993 |
| 6                               | N | -3.8322  | -0.04516 | 0.58452  | 6                               | N | -2.80695 | 2.37444  | -0.48573 |
| 7                               | C | -5.18244 | 0.44595  | 0.45347  | 7                               | C | -4.22074 | 2.63783  | -0.59283 |
| 8                               | H | -5.78881 | -0.38461 | 0.08527  | 8                               | H | -4.37622 | 3.66987  | -0.27058 |
| 9                               | H | -5.56992 | 0.79085  | 1.41869  | 9                               | H | -4.56588 | 2.51447  | -1.62582 |
| 10                              | H | -5.2235  | 1.28372  | -0.25249 | 10                              | H | -4.79301 | 1.95382  | 0.04418  |
| 11                              | O | -4.23582 | -2.1955  | -0.25221 | 11                              | O | -2.1791  | 4.49975  | 0.27026  |
| 12                              | O | -2.82695 | 1.94446  | 1.16292  | 12                              | O | -2.84755 | 0.17089  | -1.13209 |
| 13                              | C | 1.10445  | -3.7077  | -0.89032 | 13                              | C | 3.30262  | 3.56596  | 0.75284  |
| 14                              | H | 1.67518  | -4.10118 | -0.03441 | 14                              | H | 3.8406   | 3.56022  | -0.20891 |
| 15                              | H | 0.89494  | -4.57786 | -1.52938 | 15                              | H | 3.54934  | 4.5288   | 1.22343  |
| 16                              | C | 3.74321  | -0.47257 | 0.91289  | 16                              | C | 4.1566   | -0.76206 | -0.65491 |
| 17                              | O | 4.94335  | -0.65066 | 0.89416  | 17                              | O | 5.26999  | -1.17261 | -0.40124 |
| 18                              | O | 3.32179  | 0.7598   | 1.32429  | 18                              | O | 3.17887  | -1.70476 | -0.79189 |
| 19                              | C | 2.76739  | -1.54626 | 0.47865  | 19                              | C | 3.7813   | 0.68748  | -0.27156 |
| 20                              | H | 1.90344  | -1.60638 | 1.14476  | 20                              | H | 2.96342  | 1.01699  | -0.91466 |
| 21                              | H | 3.34105  | -2.47407 | 0.56622  | 21                              | H | 4.69561  | 1.21599  | -0.56212 |
| 22                              | C | -1.08204 | -2.39732 | -0.10456 | 22                              | C | 0.69681  | 3.19427  | 0.30239  |
| 23                              | C | -0.31634 | 0.2918   | 1.09403  | 23                              | C | 0.17428  | 0.34193  | -0.45922 |
| 24                              | C | -1.55497 | -0.14338 | 0.78982  | 24                              | C | -0.76504 | 1.34077  | -0.46118 |
| 25                              | C | 2.0374   | 1.31244  | 1.42772  | 25                              | C | 1.80174  | -1.59065 | -1.02298 |
| 26                              | C | 2.00444  | -2.72087 | -1.68035 | 26                              | C | 3.85725  | 2.42383  | 1.64037  |



|                                 |   |          |          |          |                                |   |          |          |          |
|---------------------------------|---|----------|----------|----------|--------------------------------|---|----------|----------|----------|
| 27                              | H | 1.53401  | -2.51513 | -2.64995 | 27                             | H | 3.51387  | 2.58032  | 2.67086  |
| 28                              | H | 2.96034  | -3.22516 | -1.88477 | 28                             | H | 4.95445  | 2.50023  | 1.65073  |
| 29                              | C | 2.278    | -1.37579 | -0.98282 | 29                             | C | 3.45077  | 1.00504  | 1.2101   |
| 30                              | H | 3.03286  | -0.83616 | -1.56857 | 30                             | H | 3.97706  | 0.29307  | 1.85777  |
| 31                              | H | 1.36988  | -0.76683 | -0.98887 | 31                             | H | 2.3772   | 0.86447  | 1.36724  |
| 32                              | P | -0.50146 | 3.03724  | -1.38355 | 32                             | P | -0.68227 | -3.4859  | -2.00621 |
| 33                              | O | -0.66709 | 4.11094  | -2.38894 | 33                             | O | 0.45316  | -4.28363 | -2.52221 |
| 34                              | O | -1.45792 | 1.74483  | -1.68053 | 34                             | O | -1.84006 | -3.23784 | -3.13507 |
| 35                              | H | -1.72721 | 1.77441  | -2.61182 | 35                             | H | -1.64281 | -3.81546 | -3.88879 |
| 36                              | O | -0.82623 | 3.35431  | 0.14121  | 36                             | O | -0.40074 | -2.01806 | -1.46753 |
| 37                              | H | -1.58223 | 2.82686  | 0.54712  | 37                             | H | -0.09465 | -0.76179 | -0.93079 |
| 38                              | O | 1.00882  | 2.475    | -1.35696 | 38                             | O | -1.42807 | -4.22594 | -0.78314 |
| 39                              | C | 2.15451  | 2.75742  | 1.82355  | 39                             | C | 1.91268  | -2.0085  | -2.46206 |
| 40                              | H | 2.81097  | 3.29195  | 1.12511  | 40                             | H | 1.72596  | -3.08516 | -2.56582 |
| 41                              | H | 1.17062  | 3.23078  | 1.80521  | 41                             | H | 1.1821   | -1.46998 | -3.0688  |
| 42                              | H | 2.59123  | 2.85637  | 2.82771  | 42                             | H | 2.92433  | -1.81134 | -2.8443  |
| 43                              | H | 1.16638  | 1.91025  | -0.57094 | 43                             | H | -2.0745  | -3.63403 | -0.34738 |
| <b>EDY-B</b>                    |   |          |          |          | <b>EDY-B</b>                   |   |          |          |          |
| <b>III</b>                      |   |          |          |          | <b>TS3</b>                     |   |          |          |          |
| E(RB3LYP) = -1617.94629184 A.U. |   |          |          |          | E(RB3LYP) = -974.29843908 A.U. |   |          |          |          |
| G(298.15 K) = -1617.685414 A.U. |   |          |          |          | G(298.15 K) = -974.064175 A.U. |   |          |          |          |
| Imaginary frequency = 0         |   |          |          |          | Imaginary frequency = 1        |   |          |          |          |
| 1                               | C | -2.49077 | 0.37445  | -0.07642 | 1                              | C | 1.9647   | -0.8005  | -0.1438  |
| 2                               | C | -1.32651 | 2.65168  | 0.47975  | 2                              | C | -0.47694 | -0.96704 | -0.28983 |
| 3                               | C | 0.51276  | -0.68588 | -0.97215 | 3                              | C | -0.44752 | 0.90428  | 0.03772  |
| 4                               | C | -2.93476 | -1.88091 | -0.3427  | 4                              | C | 3.39691  | 1.05678  | 0.05011  |
| 5                               | C | -3.97872 | 0.15637  | -0.08108 | 5                              | C | 3.3673   | -1.28399 | -0.05635 |
| 6                               | N | -4.1638  | -1.21704 | -0.24534 | 6                              | N | 4.15571  | -0.11912 | 0.04308  |
| 7                               | C | -5.44668 | -1.88042 | -0.31445 | 7                              | C | 5.6029   | -0.15228 | 0.13151  |
| 8                               | H | -6.21438 | -1.13981 | -0.08213 | 8                              | H | 5.90703  | -0.89227 | 0.87601  |
| 9                               | H | -5.62171 | -2.2913  | -1.31501 | 9                              | H | 6.04445  | -0.42385 | -0.83302 |
| 10                              | H | -5.48289 | -2.70111 | 0.4081   | 10                             | H | 5.94239  | 0.84337  | 0.4217   |
| 11                              | O | -4.86892 | 0.97695  | 0.03934  | 11                             | O | 3.81048  | -2.41456 | -0.06959 |
| 12                              | O | -2.81369 | -3.07869 | -0.49589 | 12                             | O | 3.83562  | 2.18697  | 0.14552  |
| 13                              | C | -0.43678 | 3.7618   | 0.80054  | 13                             | C | -1.72345 | -1.4978  | -0.68256 |
| 14                              | H | -0.11729 | 4.23736  | -0.13775 | 14                             | H | -2.31986 | -0.83531 | -1.3191  |
| 15                              | H | -0.9644  | 4.53801  | 1.37104  | 15                             | H | -1.4068  | -2.31922 | -1.3341  |
| 16                              | C | 2.91607  | 1.25135  | -0.92465 | 16                             | C | -3.87453 | 0.56982  | -0.08262 |
| 17                              | O | 4.05216  | 1.62686  | -0.75712 | 17                             | O | -4.10613 | 1.15835  | -1.10839 |
| 18                              | O | 2.7217   | 0.10991  | -1.64246 | 18                             | O | -2.72273 | 0.74109  | 0.6597   |
| 19                              | C | 1.73002  | 2.0903   | -0.48987 | 19                             | C | -4.68749 | -0.5303  | 0.55245  |
| 20                              | H | 0.81718  | 1.81989  | -1.0265  | 20                             | H | -5.71736 | -0.4455  | 0.19724  |
| 21                              | H | 2.00972  | 3.11273  | -0.77416 | 21                             | H | -4.67033 | -0.39268 | 1.63872  |
| 22                              | C | -1.8996  | 1.62133  | 0.19557  | 22                             | C | 0.73706  | -1.40093 | -0.24184 |

|    |   |          |          |          |    |   |          |          |          |
|----|---|----------|----------|----------|----|---|----------|----------|----------|
| 23 | C | -0.45749 | -1.19611 | -0.23226 | 23 | C | 0.82424  | 1.34993  | 0.02594  |
| 24 | C | -1.86275 | -0.82498 | -0.24065 | 24 | C | 1.97634  | 0.61279  | -0.06584 |
| 25 | C | 1.59805  | -0.69691 | -1.71632 | 25 | C | -1.62824 | 1.44247  | 0.18192  |
| 26 | C | 0.8158   | 3.29282  | 1.58938  | 26 | C | -1.81343 | 2.91608  | 0.05122  |
| 27 | H | 0.53035  | 3.10869  | 2.63255  | 27 | H | -2.07074 | 3.36083  | 1.02263  |
| 28 | H | 1.52951  | 4.12805  | 1.59569  | 28 | H | -0.92456 | 3.41287  | -0.34018 |
| 29 | C | 1.49462  | 2.03167  | 1.03251  | 29 | H | -2.64902 | 3.11251  | -0.63029 |
| 30 | H | 2.45559  | 1.89118  | 1.53786  | 30 | H | 0.89212  | 2.42116  | 0.17861  |
| 31 | H | 0.88526  | 1.15048  | 1.24924  | 31 | C | -2.59918 | -2.08664 | 0.46505  |
| 32 | P | 2.55416  | -2.59231 | 1.16363  | 32 | H | -2.3414  | -1.61242 | 1.41687  |
| 33 | O | 3.16448  | -2.96613 | -0.15609 | 33 | H | -2.36235 | -3.15058 | 0.57567  |
| 34 | O | 3.56649  | -3.14435 | 2.36697  | 34 | C | -4.11096 | -1.93237 | 0.20793  |
| 35 | H | 4.41645  | -3.29665 | 1.92547  | 35 | H | -4.33009 | -2.15943 | -0.84321 |
| 36 | O | 1.14517  | -2.92019 | 1.5941   | 36 | H | -4.66771 | -2.66217 | 0.80701  |
| 37 | H | -0.15984 | -2.01887 | 0.44648  |    |   |          |          |          |
| 38 | O | 2.71749  | -0.92734 | 1.33475  |    |   |          |          |          |
| 39 | C | 1.82796  | -1.74875 | -2.76655 |    |   |          |          |          |
| 40 | H | 2.58696  | -2.42192 | -2.34997 |    |   |          |          |          |
| 41 | H | 0.91442  | -2.31648 | -2.9549  |    |   |          |          |          |
| 42 | H | 2.18895  | -1.30122 | -3.7007  |    |   |          |          |          |
| 43 | H | 2.08967  | -0.68452 | 2.03215  |    |   |          |          |          |

**EDY-B**

**IV**

$E(\text{RB3LYP}) = -974.35049077 \text{ A.U.}$

$G(298.15 \text{ K}) = -974.113798 \text{ A.U.}$

Imaginary frequency = 0

|    |   |          |          |          |
|----|---|----------|----------|----------|
| 1  | C | -1.96431 | -0.80113 | 0.14502  |
| 2  | C | 0.47381  | -0.75219 | 0.25273  |
| 3  | C | 0.45065  | 0.68959  | 0.00001  |
| 4  | C | -3.39769 | 1.05443  | -0.04808 |
| 5  | C | -3.36601 | -1.28649 | 0.05518  |
| 6  | N | -4.15549 | -0.12107 | -0.04396 |
| 7  | C | -5.5657  | -0.16847 | 0.29134  |
| 8  | H | -6.03362 | -0.97137 | -0.28167 |
| 9  | H | -5.70934 | -0.36425 | 1.35972  |
| 10 | H | -6.01268 | 0.79592  | 0.04239  |
| 11 | O | -3.80486 | -2.41874 | 0.06464  |
| 12 | O | -3.84027 | 2.18311  | -0.14402 |
| 13 | C | 1.72396  | -1.49666 | 0.68407  |
| 14 | H | 2.32007  | -0.83319 | 1.31984  |
| 15 | H | 1.40773  | -2.31752 | 1.33652  |
| 16 | C | 3.87401  | 0.57105  | 0.08143  |
| 17 | O | 4.10547  | 1.16019  | 1.10689  |
| 18 | O | 2.72209  | 0.74149  | -0.66086 |

|    |   |          |          |          |
|----|---|----------|----------|----------|
| 19 | C | 4.68735  | -0.52923 | -0.55292 |
| 20 | H | 5.71735  | -0.44341 | -0.19835 |
| 21 | H | 4.6695   | -0.39299 | -1.63934 |
| 22 | C | -0.73648 | -1.40133 | 0.242    |
| 23 | C | -0.82482 | 1.3497   | -0.0247  |
| 24 | C | -1.97657 | 0.6123   | 0.06841  |
| 25 | C | 1.62748  | 1.44283  | -0.18293 |
| 26 | C | 1.81254  | 2.91652  | -0.05292 |
| 27 | H | 2.06912  | 3.36084  | -1.0247  |
| 28 | H | 0.92384  | 3.41331  | 0.33886  |
| 29 | H | 2.64855  | 3.11336  | 0.62794  |
| 30 | H | -0.89306 | 2.42087  | -0.17761 |
| 31 | C | 2.59987  | -2.08639 | -0.46299 |
| 32 | H | 2.34178  | -1.61323 | -1.41524 |
| 33 | H | 2.36338  | -3.15052 | -0.57249 |
| 34 | C | 4.11163  | -1.93113 | -0.20626 |
| 35 | H | 4.33106  | -2.15649 | 0.84518  |
| 36 | H | 4.66864  | -2.66156 | -0.80434 |

Table S5 Cartesian Coordinates of stationary points of other enediynes for MSC, Absolute Energies (A.U.).

|                                |   |          |          |          |                                |   |          |          |          |
|--------------------------------|---|----------|----------|----------|--------------------------------|---|----------|----------|----------|
| <b>EDY-A</b>                   |   |          |          |          | <b>EDY-A</b>                   |   |          |          |          |
| <b>A-III</b>                   |   |          |          |          | <b>A-TS3</b>                   |   |          |          |          |
| E(RB3LYP) = -935.00962041 A.U. |   |          |          |          | E(RB3LYP) = -934.97524290 A.U. |   |          |          |          |
| G(298.15 K) = -934.804460 A.U. |   |          |          |          | G(298.15 K) = -934.770057 A.U. |   |          |          |          |
| Imaginary frequency = 0        |   |          |          |          | Imaginary frequency = 1        |   |          |          |          |
| 1                              | C | -1.65515 | -0.45666 | -0.24951 | 1                              | C | 1.55527  | 0.70928  | -0.19497 |
| 2                              | C | 0.54804  | -1.6043  | -1.02888 | 2                              | C | -0.87541 | 0.92507  | -0.49916 |
| 3                              | C | 0.72491  | 1.56362  | 0.23629  | 3                              | C | -0.88628 | -0.96424 | -0.2982  |
| 4                              | C | -3.02039 | 1.11916  | 0.76334  | 4                              | C | 2.93671  | -1.1624  | 0.15022  |
| 5                              | C | -3.08404 | -0.94082 | -0.26184 | 5                              | C | 2.96402  | 1.16869  | -0.08385 |
| 6                              | N | -3.83466 | 0.06503  | 0.35619  | 6                              | N | 3.71967  | -0.005   | 0.12223  |
| 7                              | C | -5.27455 | 0.02777  | 0.53529  | 7                              | C | 5.16279  | -0.00783 | 0.27358  |
| 8                              | H | -5.52529 | 0.56496  | 1.45223  | 8                              | H | 5.44292  | -0.82939 | 0.93579  |
| 9                              | H | -5.78856 | 0.50224  | -0.30762 | 9                              | H | 5.65776  | -0.14475 | -0.69399 |
| 10                             | H | -5.5883  | -1.01532 | 0.60456  | 10                             | H | 5.46716  | 0.951    | 0.69705  |
| 11                             | O | -3.52376 | -1.98323 | -0.69697 | 11                             | O | 3.42603  | 2.28978  | -0.14046 |
| 12                             | O | -3.39271 | 2.12688  | 1.33283  | 12                             | O | 3.34712  | -2.29438 | 0.3156   |
| 13                             | C | 1.95004  | -1.99256 | -1.12756 | 13                             | C | -2.12855 | 1.52599  | -0.68802 |
| 14                             | H | 2.07568  | -2.91053 | -1.71406 | 14                             | H | -1.83571 | 2.50629  | -1.07565 |
| 15                             | H | 2.50234  | -1.20187 | -1.65582 | 15                             | H | -2.75969 | 1.06197  | -1.45467 |
| 16                             | C | 3.45404  | 0.08682  | 0.88126  | 16                             | C | -4.11363 | -0.41571 | 0.22517  |
| 17                             | O | 4.61085  | -0.01643 | 1.2014   | 17                             | O | -5.28203 | -0.35255 | -0.0372  |
| 18                             | O | 3.12731  | 1.18183  | 0.11131  | 18                             | O | -3.323   | -1.25267 | -0.56591 |

|                                 |   |          |          |          |                                 |   |          |          |          |
|---------------------------------|---|----------|----------|----------|---------------------------------|---|----------|----------|----------|
| 19                              | C | 2.42444  | -0.97284 | 1.22225  | 19                              | C | -3.40547 | 0.41681  | 1.26505  |
| 20                              | H | 1.40331  | -0.59154 | 1.21902  | 20                              | H | -2.55557 | -0.1217  | 1.6927   |
| 21                              | H | 2.66812  | -1.28848 | 2.2404   | 21                              | H | -4.1242  | 0.62577  | 2.06057  |
| 22                              | C | 2.5516   | -2.19753 | 0.28891  | 22                              | C | -2.94245 | 1.73631  | 0.60678  |
| 23                              | H | 3.60951  | -2.46456 | 0.1883   | 23                              | H | -3.826   | 2.34006  | 0.37026  |
| 24                              | H | 2.04248  | -3.04389 | 0.76156  | 24                              | H | -2.34204 | 2.29818  | 1.33071  |
| 25                              | C | -0.5436  | -1.16828 | -0.72356 | 25                              | C | 0.34716  | 1.3257   | -0.3955  |
| 26                              | C | -0.52449 | 1.6648   | 0.66219  | 26                              | C | 0.36779  | -1.41701 | -0.11462 |
| 27                              | C | -1.61616 | 0.75961  | 0.36797  | 27                              | C | 1.53123  | -0.69734 | -0.05455 |
| 28                              | C | 1.89296  | 1.63433  | -0.35288 | 28                              | C | -2.01658 | -1.57995 | -0.35435 |
| 29                              | H | -0.80916 | 2.52062  | 1.27716  | 29                              | H | 0.39369  | -2.49725 | -0.00457 |
| 30                              | C | 2.09939  | 2.36981  | -1.65264 | 30                              | C | -1.82369 | -3.10682 | -0.29922 |
| 31                              | H | 2.54091  | 1.69891  | -2.39895 | 31                              | H | -1.17982 | -3.41401 | -1.0967  |
| 32                              | H | 1.15592  | 2.76311  | -2.03625 | 32                              | H | -1.38434 | -3.37721 | 0.6382   |
| 33                              | H | 2.79893  | 3.19936  | -1.49594 | 33                              | H | -2.77288 | -3.59014 | -0.40087 |
| <b>EDY-C</b>                    |   |          |          |          | <b>EDY-C</b>                    |   |          |          |          |
| <b>C-III</b>                    |   |          |          |          | <b>C-TS3</b>                    |   |          |          |          |
| E(RB3LYP) = -1013.65868101 A.U. |   |          |          |          | E(RB3LYP) = -1013.61560022 A.U. |   |          |          |          |
| G(298.15 K) = -1013.396627 A.U. |   |          |          |          | G(298.15 K) = -1013.354021 A.U. |   |          |          |          |
| Imaginary frequency = 0         |   |          |          |          | Imaginary frequency = 1         |   |          |          |          |
| 1                               | C | 2.40572  | 0.30435  | 0.29723  | 1                               | C | 1.9682   | -0.70405 | -0.06773 |
| 2                               | C | 0.08403  | 1.23629  | 1.05164  | 2                               | C | -0.39547 | -0.95448 | -0.77301 |
| 3                               | C | 0.30897  | -1.98132 | -0.29156 | 3                               | C | -0.30689 | 1.1488   | -0.543   |
| 4                               | C | 4.01004  | -1.14737 | -0.54316 | 4                               | C | 3.46706  | 1.06266  | 0.22462  |
| 5                               | C | 3.76636  | 0.96943  | 0.32707  | 5                               | C | 3.36728  | -1.23749 | -0.06398 |
| 6                               | N | 4.66851  | 0.02285  | -0.17629 | 6                               | N | 4.19414  | -0.12863 | 0.17272  |
| 7                               | C | 6.09473  | 0.2339   | -0.34826 | 7                               | C | 5.63624  | -0.21111 | 0.30981  |
| 8                               | H | 6.6618   | -0.19027 | 0.48739  | 8                               | H | 6.0652   | 0.7441   | 0.00126  |
| 9                               | H | 6.41352  | -0.25491 | -1.27207 | 9                               | H | 5.92187  | -0.41611 | 1.34727  |
| 10                              | H | 6.28043  | 1.30794  | -0.40176 | 10                              | H | 6.0018   | -1.02023 | -0.32564 |
| 11                              | O | 4.05214  | 2.09283  | 0.68104  | 11                              | O | 3.75041  | -2.37989 | -0.2045  |
| 12                              | O | 4.53353  | -2.1346  | -1.02429 | 12                              | O | 3.93745  | 2.17742  | 0.33752  |
| 13                              | C | -1.25378 | 1.6321   | 1.48407  | 13                              | C | -1.70044 | -1.52561 | -1.19112 |
| 14                              | H | -1.86953 | 0.73109  | 1.60091  | 14                              | H | -2.43034 | -0.75235 | -1.40105 |
| 15                              | H | -1.17774 | 2.08344  | 2.48231  | 15                              | H | -1.51334 | -2.00189 | -2.16385 |
| 16                              | C | -3.01213 | -0.9653  | -0.19427 | 16                              | C | -3.06487 | 1.26334  | 1.0402   |
| 17                              | O | -3.29695 | -1.03766 | 0.98185  | 17                              | O | -3.83176 | 1.68279  | 0.21268  |
| 18                              | O | -1.90992 | -1.52334 | -0.76547 | 18                              | O | -1.78018 | 1.77543  | 1.04763  |
| 19                              | C | -3.80745 | -0.15272 | -1.19218 | 19                              | C | -3.42853 | 0.17412  | 2.0373   |
| 20                              | H | -4.83368 | -0.53899 | -1.18936 | 20                              | H | -4.31417 | 0.55377  | 2.56169  |
| 21                              | H | -3.39639 | -0.26316 | -2.19895 | 21                              | H | -2.64518 | 0.02528  | 2.78282  |
| 22                              | C | 1.58517  | -1.94086 | -0.6258  | 22                              | C | 0.99809  | 1.54223  | -0.32362 |
| 23                              | C | 2.5563   | -0.94006 | -0.24066 | 23                              | C | 2.02559  | 0.67737  | 0.07755  |
| 24                              | C | -0.94367 | -2.18524 | 0.02977  | 24                              | C | -1.47077 | 1.76779  | -0.2981  |

|                                |   |          |          |          |                                |   |          |          |          |
|--------------------------------|---|----------|----------|----------|--------------------------------|---|----------|----------|----------|
| 25                             | C | -1.40254 | -3.16152 | 1.0798   | 25                             | C | -1.99129 | 2.93212  | -1.10422 |
| 26                             | H | -0.5483  | -3.74899 | 1.4245   | 26                             | H | -1.26099 | 3.26172  | -1.84477 |
| 27                             | H | -1.87501 | -2.66184 | 1.9264   | 27                             | H | -2.90747 | 2.61697  | -1.6209  |
| 28                             | H | -2.14175 | -3.84111 | 0.63834  | 28                             | H | -2.26007 | 3.7887   | -0.47417 |
| 29                             | H | 1.97868  | -2.70958 | -1.29323 | 29                             | H | 1.29828  | 2.55206  | -0.60454 |
| 30                             | C | -1.94751 | 2.6333   | 0.52432  | 30                             | C | -2.26167 | -2.59887 | -0.23448 |
| 31                             | H | -2.80327 | 3.06856  | 1.05575  | 31                             | H | -3.1645  | -3.01308 | -0.70275 |
| 32                             | H | -1.24985 | 3.45481  | 0.32795  | 32                             | H | -1.52877 | -3.41322 | -0.17829 |
| 33                             | C | -3.81467 | 1.32362  | -0.73906 | 33                             | C | -3.77697 | -1.17701 | 1.37271  |
| 34                             | H | -4.2056  | 1.34908  | 0.2849   | 34                             | H | -4.27534 | -0.98765 | 0.41461  |
| 35                             | H | -4.53856 | 1.86453  | -1.35907 | 35                             | H | -4.5165  | -1.66863 | 2.01507  |
| 36                             | C | -2.42853 | 2.02493  | -0.80927 | 36                             | C | -2.59346 | -2.14989 | 1.19527  |
| 37                             | H | -1.66573 | 1.32625  | -1.1783  | 37                             | H | -1.69333 | -1.72186 | 1.65925  |
| 38                             | H | -2.47725 | 2.82708  | -1.55425 | 38                             | H | -2.82273 | -3.05735 | 1.76842  |
| 39                             | C | 1.19987  | 0.89247  | 0.71202  | 39                             | C | 0.77886  | -1.30012 | -0.4392  |
| <b>EDY-D</b>                   |   |          |          |          | <b>EDY-D</b>                   |   |          |          |          |
| <b>D-MSC1-III</b>              |   |          |          |          | <b>D-MSC1-TS3</b>              |   |          |          |          |
| E(RB3LYP) = -935.00819591 A.U. |   |          |          |          | E(RB3LYP) = -934.96515475 A.U. |   |          |          |          |
| G(298.15 K) = -934.801996 A.U. |   |          |          |          | G(298.15 K) = -934.757521 A.U. |   |          |          |          |
| Imaginary frequency = 0        |   |          |          |          | Imaginary frequency = 1        |   |          |          |          |
| 1                              | C | -1.89033 | 0.23751  | -0.22481 | 1                              | C | 1.79596  | 0.7892   | 0.19353  |
| 2                              | C | 0.20446  | 1.76396  | -0.53379 | 2                              | C | -0.46987 | 1.5375   | 0.72067  |
| 3                              | C | 0.48708  | -1.71171 | -0.99125 | 3                              | C | -0.80731 | -0.31899 | 0.94336  |
| 4                              | C | -3.22333 | -1.65962 | -0.17698 | 4                              | C | 2.72997  | -1.3509  | -0.08926 |
| 5                              | C | -3.29875 | 0.61219  | 0.1812   | 5                              | C | 3.25449  | 0.92998  | -0.08992 |
| 6                              | N | -4.02443 | -0.58324 | 0.19606  | 6                              | N | 3.72891  | -0.38272 | -0.25673 |
| 7                              | C | -5.43018 | -0.69617 | 0.54138  | 7                              | C | 5.11282  | -0.68788 | -0.56855 |
| 8                              | H | -5.56304 | -0.80737 | 1.62282  | 8                              | H | 5.37124  | -0.31911 | -1.56597 |
| 9                              | H | -5.95061 | 0.20367  | 0.20805  | 9                              | H | 5.77237  | -0.2124  | 0.16233  |
| 10                             | H | -5.83292 | -1.57883 | 0.0406   | 10                             | H | 5.22848  | -1.77225 | -0.53342 |
| 11                             | O | -3.74432 | 1.71072  | 0.43276  | 11                             | O | 3.93735  | 1.92885  | -0.18058 |
| 12                             | O | -3.58301 | -2.81691 | -0.27279 | 12                             | O | 2.88441  | -2.55294 | -0.16924 |
| 13                             | C | 1.51735  | 2.38998  | -0.64787 | 13                             | C | -1.6647  | 2.29103  | 0.63564  |
| 14                             | H | 2.05938  | 1.90711  | -1.47416 | 14                             | H | -2.40595 | 2.11485  | 1.4228   |
| 15                             | H | 1.42309  | 3.44814  | -0.92024 | 15                             | H | -1.29212 | 3.30817  | 0.79288  |
| 16                             | C | 3.70656  | -1.37097 | 0.39002  | 16                             | C | -3.74903 | -1.2723  | -0.22107 |
| 17                             | O | 4.53747  | -1.97891 | 1.01119  | 17                             | O | -4.36435 | -2.19389 | -0.67592 |
| 18                             | O | 2.6391   | -2.0836  | -0.12234 | 18                             | O | -2.68893 | -1.55207 | 0.65489  |
| 19                             | C | 3.69885  | 0.13296  | 0.20408  | 19                             | C | -3.99092 | 0.19918  | -0.53592 |
| 20                             | H | 3.55401  | 0.38198  | -0.85305 | 20                             | H | -4.20449 | 0.73542  | 0.39624  |
| 21                             | H | 4.69034  | 0.48974  | 0.49407  | 21                             | H | -4.90708 | 0.22361  | -1.12897 |
| 22                             | C | -0.80126 | -1.98557 | -0.90916 | 22                             | C | 0.23591  | -1.04726 | 0.57656  |
| 23                             | C | -1.85263 | -1.10805 | -0.44094 | 23                             | C | 1.48077  | -0.58757 | 0.2101   |
| 24                             | C | 2.33169  | 2.25838  | 0.66686  | 24                             | C | -2.34915 | 2.24707  | -0.76162 |

|                                |   |          |          |          |                                |   |          |          |          |
|--------------------------------|---|----------|----------|----------|--------------------------------|---|----------|----------|----------|
| 25                             | H | 1.77406  | 2.75867  | 1.46625  | 25                             | H | -1.63867 | 2.66     | -1.48842 |
| 26                             | H | 3.27556  | 2.80479  | 0.54284  | 26                             | H | -3.20403 | 2.93628  | -0.73579 |
| 27                             | C | 2.61085  | 0.80397  | 1.07394  | 27                             | C | -2.81404 | 0.88035  | -1.30485 |
| 28                             | H | 2.93586  | 0.76719  | 2.11961  | 28                             | H | -3.13684 | 1.02966  | -2.34077 |
| 29                             | H | 1.6781   | 0.23289  | 1.0168   | 29                             | H | -1.95616 | 0.20366  | -1.36579 |
| 30                             | H | -1.14676 | -2.97234 | -1.22178 | 30                             | H | 0.0273   | -2.1097  | 0.6444   |
| 31                             | C | 1.78195  | -1.56394 | -1.08887 | 31                             | C | -2.08029 | -0.49714 | 1.27738  |
| 32                             | H | 2.25629  | -1.12062 | -1.96309 | 32                             | H | -2.71423 | 0.11171  | 1.91148  |
| 33                             | C | -0.82048 | 1.13401  | -0.36741 | 33                             | C | 0.78371  | 1.67599  | 0.44609  |
| <b>EDY-D</b>                   |   |          |          |          | <b>EDY-D</b>                   |   |          |          |          |
| <b>D-MS2-III</b>               |   |          |          |          | <b>D-MS2-TS3</b>               |   |          |          |          |
| E(RB3LYP) = -934.99999894 A.U. |   |          |          |          | E(RB3LYP) = -934.97021379 A.U. |   |          |          |          |
| G(298.15 K) = -934.792666 A.U. |   |          |          |          | G(298.15 K) = -934.763137 A.U. |   |          |          |          |
| Imaginary frequency = 0        |   |          |          |          | Imaginary frequency = 1        |   |          |          |          |
| 1                              | C | -1.7455  | 0.2202   | 0.07249  | 1                              | C | -0.10878 | -0.58398 | 0.62847  |
| 2                              | C | -3.82011 | -0.94048 | -0.02832 | 2                              | C | -1.54839 | -2.52241 | 0.40826  |
| 3                              | C | -2.88736 | 1.19789  | 0.14358  | 3                              | C | -0.87824 | -0.84747 | 1.92765  |
| 4                              | N | -4.05722 | 0.43185  | 0.10416  | 4                              | N | -1.93467 | -1.87954 | 1.69918  |
| 5                              | C | -5.38102 | 1.01926  | 0.19504  | 5                              | C | -3.24882 | -1.23421 | 1.56705  |
| 6                              | H | -6.10317 | 0.20269  | 0.23615  | 6                              | H | -3.99057 | -1.97567 | 1.35502  |
| 7                              | H | -5.45075 | 1.63611  | 1.09521  | 7                              | H | -3.49456 | -0.73504 | 2.48102  |
| 8                              | H | -5.57831 | 1.6505   | -0.67661 | 8                              | H | -3.21791 | -0.5222  | 0.76893  |
| 9                              | O | -2.86109 | 2.40776  | 0.23749  | 9                              | O | -0.64999 | -0.2809  | 3.02786  |
| 10                             | O | -4.68065 | -1.79922 | -0.09285 | 10                             | O | -1.98637 | -3.62519 | -0.01081 |
| 11                             | C | 1.73788  | 1.1648   | -0.82386 | 11                             | C | 2.52957  | 1.80241  | 1.89587  |
| 12                             | H | 1.7861   | 0.25323  | -1.43317 | 12                             | H | 2.90755  | 2.37629  | 1.07569  |
| 13                             | H | 1.33653  | 1.94159  | -1.48567 | 13                             | H | 2.5234   | 2.40263  | 2.78164  |
| 14                             | C | 2.71671  | -1.57109 | 0.49918  | 14                             | C | 3.5966   | 0.74882  | -1.50248 |
| 15                             | O | 2.20756  | -1.60815 | 1.58007  | 15                             | O | 4.28417  | 0.11653  | -2.3457  |
| 16                             | O | 2.12109  | -2.19764 | -0.63112 | 16                             | O | 2.30112  | 1.2637   | -1.73276 |
| 17                             | C | 3.98534  | -0.85232 | 0.11898  | 17                             | C | 4.01475  | 1.04558  | -0.11569 |
| 18                             | H | 4.18025  | -0.95279 | -0.95193 | 18                             | H | 3.56492  | 1.97824  | 0.15393  |
| 19                             | H | 4.80051  | -1.34462 | 0.66245  | 19                             | H | 5.07646  | 1.12197  | -0.00681 |
| 20                             | C | -0.48084 | 0.58115  | 0.18689  | 20                             | C | 0.72907  | 0.3856   | 0.53689  |
| 21                             | C | -1.77249 | -2.31743 | -0.32976 | 21                             | C | -0.05159 | -1.73567 | -1.56442 |
| 22                             | C | -2.33988 | -1.1117  | -0.08597 | 22                             | C | -0.53492 | -1.64187 | -0.32582 |
| 23                             | C | 0.82953  | -2.42084 | -0.53957 | 23                             | C | 1.44781  | 0.32805  | -1.32861 |
| 24                             | C | 3.15797  | 1.5764   | -0.39493 | 24                             | C | 3.44199  | 0.57538  | 2.11735  |
| 25                             | H | 3.11845  | 2.56618  | 0.0784   | 25                             | H | 3.05004  | -0.0753  | 2.87093  |
| 26                             | H | 3.75389  | 1.69698  | -1.30937 | 26                             | H | 4.4301   | 0.86842  | 2.40488  |
| 27                             | C | 3.91001  | 0.63053  | 0.56148  | 27                             | C | 3.45595  | -0.05337 | 0.77619  |
| 28                             | H | 4.93413  | 1.00518  | 0.66934  | 28                             | H | 4.04162  | -0.94676 | 0.71515  |
| 29                             | H | 3.46811  | 0.65772  | 1.56399  | 29                             | H | 2.44755  | -0.288   | 0.50604  |
| 30                             | H | -2.43359 | -3.17263 | -0.45579 | 30                             | H | -0.36211 | -2.5159  | -2.22753 |

|                                 |   |          |          |          |                                 |   |          |          |          |
|---------------------------------|---|----------|----------|----------|---------------------------------|---|----------|----------|----------|
| 31                              | C | 0.76604  | 0.93061  | 0.32749  | 31                              | C | 1.05863  | 1.34516  | 1.60061  |
| 32                              | H | 1.15768  | 0.99168  | 1.34411  | 32                              | H | 0.73903  | 0.8109   | 2.47085  |
| 33                              | C | -0.37579 | -2.47343 | -0.43761 | 33                              | C | 0.97281  | -0.66979 | -2.00016 |
| <b>EDY-F</b>                    |   |          |          |          | <b>EDY-F</b>                    |   |          |          |          |
| <b>F-III</b>                    |   |          |          |          | <b>F-TS3</b>                    |   |          |          |          |
| E(RB3LYP) = -1051.72222216 A.U. |   |          |          |          | E(RB3LYP) = -1051.68038785 A.U. |   |          |          |          |
| G(298.15 K) = -1051.455377 A.U. |   |          |          |          | G(298.15 K) = -1051.414697 A.U. |   |          |          |          |
| Imaginary frequency = 0         |   |          |          |          | Imaginary frequency = 1         |   |          |          |          |
| 1                               | C | -2.48233 | 0.29715  | -0.20453 | 1                               | C | -2.20099 | -0.73986 | 0.38433  |
| 2                               | C | -0.48729 | 1.90583  | -0.6905  | 2                               | C | 0.09083  | -1.50689 | 0.71962  |
| 3                               | C | -3.64641 | -1.63171 | 0.3383   | 3                               | C | -3.08716 | 1.34311  | -0.25065 |
| 4                               | C | -3.95794 | 0.60404  | -0.11019 | 4                               | C | -3.68894 | -0.83555 | 0.35915  |
| 5                               | N | -4.57884 | -0.60275 | 0.22891  | 5                               | N | -4.13491 | 0.43777  | -0.0431  |
| 6                               | C | -6.00597 | -0.77163 | 0.43234  | 6                               | C | -5.53562 | 0.78075  | -0.20058 |
| 7                               | H | -6.27017 | -0.65473 | 1.48892  | 7                               | H | -5.61951 | 1.5574   | -0.96313 |
| 8                               | H | -6.53142 | -0.01617 | -0.15453 | 8                               | H | -6.08129 | -0.11585 | -0.50059 |
| 9                               | H | -6.28793 | -1.77481 | 0.10579  | 9                               | H | -5.95579 | 1.15605  | 0.73901  |
| 10                              | O | -4.52277 | 1.66015  | -0.29767 | 10                              | O | -4.41267 | -1.77934 | 0.60178  |
| 11                              | O | -3.89625 | -2.79148 | 0.60395  | 11                              | O | -3.21389 | 2.50405  | -0.58664 |
| 12                              | C | 0.77762  | 2.63116  | -0.69245 | 12                              | C | 1.21567  | -2.34578 | 0.53651  |
| 13                              | H | 1.52801  | 2.02976  | -1.22526 | 13                              | H | 2.15208  | -2.03069 | 1.00493  |
| 14                              | H | 0.69266  | 3.57705  | -1.24072 | 14                              | H | 0.90604  | -3.26843 | 1.0376   |
| 15                              | C | 2.88631  | -0.50794 | 1.67477  | 15                              | C | 2.813    | 0.85236  | -1.52758 |
| 16                              | O | 3.50815  | -0.81858 | 2.6569   | 16                              | O | 3.06346  | 1.60177  | -2.42914 |
| 17                              | O | 2.22644  | -1.5183  | 0.99883  | 17                              | O | 2.3205   | 1.40274  | -0.3361  |
| 18                              | C | 2.77768  | 0.90811  | 1.14914  | 18                              | C | 3.01357  | -0.65587 | -1.55782 |
| 19                              | H | 2.85247  | 0.89919  | 0.06029  | 19                              | H | 3.42775  | -0.98394 | -0.60089 |
| 20                              | H | 3.64551  | 1.44453  | 1.54293  | 20                              | H | 3.77346  | -0.83163 | -2.32247 |
| 21                              | C | -1.12289 | -1.86822 | 0.0219   | 21                              | C | -0.53375 | 1.01953  | 0.10362  |
| 22                              | C | -2.2998  | -1.02812 | 0.058    | 22                              | C | -1.83581 | 0.57837  | 0.03046  |
| 23                              | H | -1.34513 | -2.93747 | 0.04043  | 23                              | H | -0.28245 | 2.05428  | -0.10413 |
| 24                              | C | 2.1443   | -1.17493 | -1.4614  | 24                              | C | 2.69665  | 0.33587  | 1.8035   |
| 25                              | H | 1.52365  | -0.69653 | -2.2144  | 25                              | H | 2.25874  | -0.30817 | 2.56006  |
| 26                              | C | 1.24662  | 2.90534  | 0.7634   | 26                              | C | 1.46099  | -2.66573 | -0.9657  |
| 27                              | H | 0.48735  | 3.52252  | 1.2557   | 27                              | H | 0.58028  | -3.19617 | -1.34821 |
| 28                              | H | 2.1686   | 3.50004  | 0.72081  | 28                              | H | 2.30448  | -3.36674 | -1.03008 |
| 29                              | C | 1.48338  | 1.62687  | 1.58342  | 29                              | C | 1.71945  | -1.46212 | -1.89111 |
| 30                              | H | 1.55362  | 1.87314  | 2.64838  | 30                              | H | 1.79676  | -1.82931 | -2.91972 |
| 31                              | H | 0.62241  | 0.95999  | 1.47045  | 31                              | H | 0.8455   | -0.80402 | -1.88068 |
| 32                              | C | 3.63804  | -0.92858 | -1.56896 | 32                              | C | 4.21986  | 0.34074  | 1.70009  |
| 33                              | H | 4.22396  | -0.89311 | -0.65593 | 33                              | H | 4.65452  | 0.49669  | 0.71727  |
| 34                              | H | 3.97366  | -0.24182 | -2.34172 | 34                              | H | 4.75788  | -0.36485 | 2.327    |
| 35                              | C | 3.07752  | -2.26248 | -1.96704 | 35                              | C | 3.53518  | 1.50559  | 2.33786  |
| 36                              | H | 3.0215   | -2.5225  | -3.02028 | 36                              | H | 3.57676  | 1.62132  | 3.41686  |

|    |   |          |          |          |    |   |          |          |         |
|----|---|----------|----------|----------|----|---|----------|----------|---------|
| 37 | H | 3.26563  | -3.0973  | -1.29836 | 37 | H | 3.48583  | 2.43116  | 1.77313 |
| 38 | C | -1.47658 | 1.22962  | -0.49426 | 38 | C | -1.19365 | -1.61779 | 0.67942 |
| 39 | C | 0.14387  | -1.499   | -0.05346 | 39 | C | 0.52927  | 0.32797  | 0.49371 |
| 40 | C | 1.44278  | -1.33634 | -0.1519  | 40 | C | 1.83214  | 0.55944  | 0.64459 |

## References:

1. Y. Wu, J. Wang, Y. Zhu, X. Yu, Z. Shang, Y. Ding and A. Hu, *Chem. Commun.*, 2021, **57**, 4146-4149.
2. K. Zhang, L. L. Xu, J. G. Jiang, N. Calin, K. F. Lam, S. J. Zhang, H. H. Wu, G. D. Wu, B. Albel, L. Bonneviot and P. Wu, *J. Am. Chem. Soc.*, 2013, **135**, 2427-2430.
3. K. M. Brummond, H. Chen, P. Sill and L. You, *J. Am. Chem. Soc.*, 2002, **124**, 15186-15187.
4. A. L. Garner and K. D. Janda, *Angew. Chem., Int. Ed.*, 2010, **49**, 9630-9634.
5. M. Abo and E. Weerapana, *J. Am. Chem. Soc.*, 2015, **137**, 7087-7090.
6. D. Leboeuf, M. Gaydou, Y. H. Wang and A. M. Echavarren, *Organic Chemistry Frontiers*, 2014, **1**, 759-764.
7. H. Chen, B. Li, M. Zhang, H. Lu, Y. Wang, W. Wang, Y. Ding and A. Hu, *ChemistrySelect*, 2020, **5**, 7069-7075.
8. M. Zhang, B. Li, H. Chen, H. Lu, H. Ma, X. Cheng, W. Wang, Y. Wang, Y. Ding and A. Hu, *J. Org. Chem.*, 2020, **85**, 9808-9819.
9. M. J. Frisch, G. W. Trucks, H. B. Schlegel, G. E. Scuseria, M. A. Robb, J. R. Cheeseman, G. Scalmani, V. Barone, B. Mennucci, G. A. Petersson, H. Nakatsuji, M. Caricato, X. Li, H. P. Hratchian, A. F. Izmaylov, J. Bloino, G. Zheng, J. L. Sonnenberg, M. Hada, M. Ehara, K. Toyota, R. Fukuda, J. Hasegawa, M. Ishida, T. Nakajima, Y. Honda, O. Kitao, H. Nakai, T. Vreven, J. A. Montgomery, Jr., J. E. Peralta, F. Ogliaro, M. Bearpark, J. J. Heyd, E. Brothers, K. N. Kudin, V. N. Staroverov, R. Kobayashi, J. Normand, K. Raghavachari, A. Rendell, J. C. Burant, S. S. Iyengar, J. Tomasi, M. Cossi, N. Rega, J. M. Millam, M. Klene, J. E. Knox, J. B. Cross, V. Bakken, C. Adamo, J. Jaramillo, R. Gomperts, R. E. Stratmann, O. Yazyev, A. J. Austin, R. Cammi, C. Pomelli, J. W. Ochterski, R. L. Martin, K. Morokuma, V. G. Zakrzewski, G. A. Voth, P. Salvador, J. J. Dannenberg, S. Dapprich, A. D. Daniels, Ö. Farkas, J. B. Foresman, J. V. Ortiz, J. Cioslowski and D. J. Fox, *Journal*, 2009.
